# Supplementary material for: Multiple runoff processes and multiple thresholds control agricultural runoff generation
Source: Copernicus journal article supplement (doi:10.5194/hess-2016-288), 2016-06-14
Supplement: Supplementary file [file hess-2016-288-RC2-supplement.pdf]

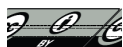

## Multiple runoff processes and multiple thresholds control agricultural runoff generation

Shabnam Saffarpour<sup>1</sup>, Andrew W. Western<sup>1</sup>, Russell Adams<sup>1</sup>, and Jeffrey J. McDonnell<sup>2,3</sup>

<sup>1</sup>Department of Infrastructure Engineering, The University of Melbourne, Parkville, 3010, Australia

5 <sup>2</sup>Natl Hydrol Res Ctr, Global Inst Water Secur, University of Saskatchewan, Saskatoon, SK S7N 3H5, Canada }

<sup>3</sup>School of Geosciences, University of Aberdeen, Aberdeen UK }

*Correspondence to:* Andrew Western (a.western@unimelb.edu.au)

**Abstract.** Hydrologic connectivity associated with runoff processes is a critical concept for understanding catchment hydrologic response at the event timescale. However, to date, most attention has focused on single runoff response types in individual research catchments. Here we examine how runoff response and the catchment threshold response to rainfall affect a suite of runoff generation mechanisms in a small agricultural catchment. A 1.37 ha hillslope in the Lang Lang River catchment, Victoria, Australia was instrumented and hourly data of rainfall, runoff, shallow groundwater level and isotope water samples were collected. We analyse 60 rainfall events that produced 38 runoff events over two runoff seasons. Our results show that the catchment hydrologic response was typically controlled by the antecedent soil moisture condition and rainfall characteristics. There was a strong seasonal effect in the antecedent moisture conditions that led to marked seasonal scale changes in runoff response. Analysis of shallow well data revealed that streamflows early in the runoff season were dominated primarily by saturation excess overland flow from the riparian area. As the runoff season progressed, the catchment soil water storage increased and the hillslope connected to the riparian area. The hillslope transferred a significant amount of water to the riparian zone during and following events. Then, during a particularly wet period, this connectivity to the riparian zone, and ultimately to the stream, persisted between events for a period of one month. These findings are supported by isotope results which showed the dominance of pre-event water, and ~~increased~~ contributions of new water <sup>early</sup> (rising limb and peak) in the event hydrograph for wetter conditions. We conclude that event runoff at this site is a combination of subsurface event flow and saturation excess overland flow. However, during high intensity rainfall events, flashy hillslope flow was observed even though the soil moisture threshold for activation of subsurface flow was not exceeded. We hypothesize that this was due to the activation of infiltration excess overland flow and/or fast lateral flow through preferential pathways on the hillslope and saturation overland flow from the riparian zone.

# Summary of comments: saffarpoupr\_et-al\_2016\_hess\_288\_ed.pdf

---

Page:1

---

 Number: 1 Author: Anonymous Subject: Strikeout Date: 2016-07-29 16:11:05

---

 Number: 2 Author: Anonymous Subject: Insert Text Date: 2016-07-29 16:11:27  
increased

---

 Number: 3 Author: Anonymous Subject: Note Date: 2016-07-29 16:15:23  
Maybe this become clear in the text but how did you distinguish between these runoff source areas/mechanisms?

---

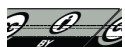

## 1 Introduction 1

Thresholds have been an integral part of overland flow theory since the early infiltration excess work of Horton (1933) and saturation excess studies of Dunne and Black (1970a, b). Thresholds in runoff response have also been observed in subsurface stormflow dominated systems (Hewlett and Hibbert, 1967). More recent work has shown these to be a function of catchment wetness status for saturation excess overland flow (Western and Grayson, 1998; Western et al., 2005) and subsurface stormflow (Freer et al., 2002; Tromp-van Meerveld et al., 2007). Hydrological connectivity is now a useful generic concept that links reservoirs to their downstream conduits (Tetzlaff et al., 2010) and a connectivity framework can provide a powerful explanator of catchment flow and transport response (Ali et al., 2013; Detty and McGuire, 2010; Lehmann et al., 2007; McGuire and McDonnell, 2010; Western et al., 1998, 2001). Connectivity and thresholds 2 are intimately related; typically a threshold in some catchment state controls the transition between connected and disconnected states; for example, the observation that subsurface flow becomes connected above some soil water storage and rainfall threshold (Detty and McGuire, 2010; Tromp-van Meerveld and McDonnell, 2006a). 3

Despite significant progress in understanding the non-linear behaviour of catchments related to soil moisture thresholds, watertable dynamics, connectivity of surface and subsurface pathways and their influence on runoff generation mechanisms, it is not explicitly understood how the non-linear properties of catchments (connectivity and thresholds) work to convert rainfall to runoff nor how such behaviours vary between different types of catchments. It has been argued that interactions between the various processes and thresholds leads to complex non-linear rainfall-runoff behaviour in catchments (Hopp and McDonnell, 2009; Kirchner, 2006; Tetzlaff et al., 2010; Uchida et al., 2005) including: thresholds for initiation of hillslope-to-stream connectivity (Ali et al., 2013; Detty and McGuire, 2010; Fujimoto et al., 2008; Lehmann et al., 2007; McGuire and McDonnell, 2010; Tromp van Meerveld and McDonnell, 2005; Tromp-van Meerveld and McDonnell, 2006a); variable flow hysteresis patterns depending on rainfall amount and antecedent soil moisture conditions (Bowes et al., 2009; Holz, 2010; McGuire and McDonnell, 2010); and flushing of nutrients in agricultural catchments (Bracken and Croke, 2007; Ocampo et al., 2006; Tockner et al., 1999; Withers and Lord, 2002).

While the concept of connectivity has been useful in many of these studies, the studies have concentrated on individual mechanisms. It is less clear how catchments behave when subject to a mixture of runoff mechanisms including infiltration excess and saturation excess overland flow, and subsurface stormflow. Few studies have tried to tease apart the influence of multiple processes in catchments where infiltration excess, saturation excess and subsurface stormflow are all important. Here we do that for an agricultural catchment in south-eastern Australia and show the shifting importance of different processes over time associated with changes in catchment wetness and rainfall intensity. Prior 4 to this, we consider the role of multiple thresholds in catchment states and fluxes as well as the role of thresholds in certain timescales in controlling different modes of hydrologic connectivity and associated rainfall-runoff response.

Figure 1 summarizes the status quo 5 in terms of the combined effects of thresholds and connectivity. 6 It shows the importance of various timescales, fluxes and states, and how these relate to variation in rainfall-runoff processes over time (and between

---

 **Number: 1 Author: Anonymous Subject: Note Date: 2016-07-29 17:52:48**

---

General Comment on Introduction:

The introduction is a lot about Fig., and less describes what others have found about thresholds and runoff mechanisms (only mentioned in a few sentences and (good list of references).

I also think, that not all studies only concluded that one runoff mechanism is dominating in their catchment. So some pervious work has also concluded, that there are multiple processes happening at the same time or vary seasonally

I also think, that it needs to be clearly stated that Fig. 1 (at least I think) is describing dominant processes at the point or plot-scale. I like the idea of the authors to go beyond that and think about aspects that need to be considered in terms of connectivity between this points but they are not in the diagram (Fig.1). (see my comments for more detail). If talking about connectivity, this term needs to be defined and also between what (e.g. hillslope stream).

Time scale: I also like the idea to pay more attention to time-scales but it needs to be defined what the authors think of. I guess, in some circumstances they are not talking about time-scale but rather duration.

The authors could be more clear what this work contributed to and say more about how their work is new!

---

 **Number: 2 Author: Anonymous Subject: Note Date: 2016-07-29 16:21:53**

---

There also exists the concept of a continuous nature of connectivity but I agree, that most studies chose the threshold-type of concept. You could say, that you chose the latter concept which implies ...

---

 **Number: 3 Author: Anonymous Subject: Note Date: 2016-07-06 13:17:59**

---

maybe add Penna et al., 2015

---

 **Number: 4 Author: Anonymous Subject: Note Date: 2016-07-29 16:27:59**

---

not 100% clear. You mean multiple threshold for different runoff generation mechanisms?

---

 **Number: 5 Author: Anonymous Subject: Note Date: 2016-07-29 16:56:42**

---

state here that Fig1 is about dominant runoff mechanisms or that you consider them to co-exist in parallel.

---

 **Number: 6 Author: Anonymous Subject: Insert Text Date: 2016-07-29 16:41:52**

---

on dominant runoff processes.

(see my comment at Fig1)



catchments).<sup>1</sup> Of course, questions of instantaneous flux and also of the relative timescales of various processes are often important in determining the existence of connectivity (Tromp van Meerveld and McDonnell, 2005; Western et al., 2005). It would be attractive to think of the problem of runoff response purely in terms of timescales<sup>2</sup> of competing processes following Oldham et al. (2013); however, both flux and time thresholds are important. This arises because there is finite<sup>3</sup> capacity for flow in various parts of the catchment system.

Figure 1 is divided into three areas. The lefthand area (~~climate and landscape characteristics~~)<sup>4</sup> provides a series of catchment thresholds that determine runoff processes and connectivity,<sup>5</sup> depending on whether they are exceeded or not. The middle area points to the outcome in terms of runoff generation processes<sup>6</sup> and the righthand area provides example catchments from the literature that exhibit those processes. Some of the thresholds are posed in terms of flux rate compared with a flow capacity (e.g. box 2) and some in terms of a state threshold (box 5). The flux and state thresholds are considered in the context of a process timescale.<sup>7</sup> This is because the threshold needs to be exceeded for a sufficient time for the action of the process to lead to a significant impact.

Consider box 1. Rainfall rates vary across a very wide range to timescales.<sup>8</sup> If the rainfall (or throughfall) intensity exceeds the infiltration threshold for only a very short time, the water that ponds on the surface will continue to infiltrate as it flows toward the stream (runon infiltration)<sup>9</sup> when the intensity reduces and very little or no runoff will result (surface connectivity didn't become established). However if average intensities exceed the infiltration capacity for long enough for ponded water to flow to the catchment outlet, the hillslope will connect to the catchment outlet via surface pathways and produce runoff. The remaining boxes consider thresholds in the context of subsurface flow times.<sup>10</sup> Box 3 considers situations where subsurface saturation exists, allowing lateral subsurface flow paths to be activated.<sup>11</sup> If any of deep infiltration through the impeding layer (Jackson et al., 2014), unfilled bedrock storage (Janzen and McDonnell, 2015) or evapotranspiration cause the saturation and/or lateral flow to dissipate before water can move a significant distance downstream, the water will not be effectively redistributed downslope and subsurface connection won't be established (this is Grayson et al.'s (1997) local control). If the saturation persists for long enough lateral subsurface flow will connect to the stream. At the other extreme (box 7), if lateral flow is persistently exceeding the hillslope subsurface flow capacity, surface saturation will exist leading to saturation excess runoff.<sup>12</sup>

Figure 1 goes about here

While Figure 1 suggests catchments are dominated by certain processes it needs to be recognised that many catchment conditions vary over time. For example summer rainfall is often more intense than winter rainfall. Soil water conditions vary seasonally in response to both rainfall and potential evapotranspiration, sometimes leading to switching between characteristic spatial patterns and prevailing responses to rainfall (Grayson et al., 1997; Western et al., 1999). Topographic, soil and vegetation conditions can also vary across a catchment. This all suggests that catchments could exhibit a mix of processes.

Here we use the above framework to understand the behaviour of a catchment that does indeed exhibit a mix of runoff processes. We examine how soil water storage and shallow water table response influence subsurface connectivity and

## Page:3

- 
-  **Number: 1** Author: Anonymous Subject: Insert Text Date: 2016-07-29 16:55:28  
with different physiographic characteristics
- 
-  **Number: 2** Author: Anonymous Subject: Note Date: 2016-07-29 16:57:24  
2006?
- 
-  **Number: 3** Author: Anonymous Subject: Note Date: 2016-07-29 17:00:44  
Do you mean the difference between the dominant runoff process concept and a concept of co-existing of these processes with different degree of importance. Can you rewrite?
- 
-  **Number: 4** Author: Anonymous Subject: Strikeout Date: 2016-07-29 17:02:03
- 
-  **Number: 5** Author: Anonymous Subject: Note Date: 2016-07-29 17:01:04  
parts?
- 
-  **Number: 6** Author: Anonymous Subject: Note Date: 2016-07-29 17:04:26  
I am not sure if they tell directly about connectivity? Connectivity between what? Hillslope stream, neighbouring sites?  
maybe better "lateral flow"?
- 
-  **Number: 7** Author: Anonymous Subject: Insert Text Date: 2016-07-29 17:02:50  
that depend on climate and landscape characteristics and ...
- 
-  **Number: 8** Author: Anonymous Subject: Insert Text Date: 2016-07-29 17:04:53  
dominant
- 
-  **Number: 9** Author: Anonymous Subject: Note Date: 2016-07-29 17:06:52  
I like this idea but I think you need to introduce the reader more to these time scales.
- 
-  **Number: 10** Author: Anonymous Subject: Note Date: 2016-07-29 17:23:24  
I think these are not time scales but time durations or simple ".. over an event"
- 
-  **Number: 11** Author: Anonymous Subject: Note Date: 2016-07-29 17:24:41  
I understand what you want to say but I think now you need to decide if you consider the diagram in Fig.1 to be on the point- scale (which I think the diagram is). If you want to consider processes such as run-on, than you need to redraw your diagram. Suggestion: try to come up with a similar diagram that considers connectivity between the hillslope and the stream and what processes can occur. For connectivity a few other criteria need to be fulfilled. Things you describe here fit well in this other context.
- 
-  **Number: 12** Author: Anonymous Subject: Note Date: 2016-07-29 17:25:04  
please define
- 
-  **Number: 13** Author: Anonymous Subject: Note Date: 2016-07-29 17:26:47  
On an event-time-scale evapotranspiration might be a minor component. It more effects e.g. antecedent conditions.
- 
-  **Number: 14** Author: Anonymous Subject: Note Date: 2016-07-29 17:28:56  
use different word
- 
-  **Number: 15** Author: Anonymous Subject: Note Date: 2016-07-29 17:31:07  
it is not only about persistence (which implies time), it is about a continuous connection (hydraulically or hydrologically from point A to point B.



catchments). Of course, questions of instantaneous flux and also of the relative timescales of various processes are often important in determining the existence of connectivity (Tromp van Meerveld and McDonnell, 2005; Western et al., 2005). It would be attractive to think of the problem of runoff response purely in terms of timescales of competing processes following Oldham et al. (2013); however, both flux and time thresholds are important. This arises because there is finite capacity for flow in various parts of the catchment system.

Figure 1 is divided into three areas, the lefthand area (~~climate and landscape characteristics~~) provides a series of catchment thresholds that determine runoff processes and connectivity, depending on whether they are exceeded or not. The middle area points to the outcome in terms of runoff generation processes and the righthand area provides example catchments from the literature that exhibit those processes. Some of the thresholds are posed in terms of flux rate compared with a flow capacity (e.g. box 2) and some in terms of a state threshold (box 5). The flux and state thresholds are considered in the context of a process timescale. This is because the threshold needs to be exceeded for a sufficient time for the action of the process to lead to a significant impact.

Consider box 1. Rainfall rates vary across a very wide range to timescales. If the rainfall (or throughfall) intensity exceeds the infiltration threshold for only a very short time, the water that ponds on the surface will continue to infiltrate as it flows toward the stream (runon infiltration) when the intensity reduces and very little or no runoff will result (surface connectivity didn't become established). However if average intensities exceed the infiltration capacity for long enough for ponded water to flow to the catchment outlet, the hillslope will connect to the catchment outlet via surface pathways and produce runoff. The remaining boxes consider thresholds in the context of subsurface flow times. Box 3 considers situations where subsurface saturation exists, allowing lateral subsurface flow paths to be activated. If any of deep infiltration through the impeding layer (Jackson et al., 2014), unfilled bedrock storage (Janzen and McDonnell, 2015) or evapotranspiration cause the saturation and/or lateral flow to dissipate before water can move a significant distance downstream, the water will not be effectively redistributed downslope and subsurface connection won't be established (this is Grayson et al.'s (1997) local control). If the saturation persists for long enough lateral subsurface flow will connect to the stream. At the other extreme (box 7), if lateral flow is persistently exceeding the hillslope subsurface flow capacity, surface saturation will exist leading to saturation excess runoff.

Figure 1 goes about here

While Figure 1 suggests catchments are dominated by certain processes it needs to be recognised that many catchment conditions vary over time. For example, summer rainfall is often more intense than winter rainfall. Soil water conditions vary seasonally in response to both rainfall and potential evapotranspiration, sometimes leading to switching between characteristic spatial patterns and prevailing responses to rainfall (Grayson et al., 1997; Western et al., 1999). Topographic, soil and vegetation conditions can also vary across a catchment. This all suggests that catchments could exhibit a mix of processes.

Here we use the above framework to understand the behaviour of a catchment that does indeed exhibit a mix of runoff processes. We examine how soil water storage and shallow water table response influence subsurface connectivity and

Please define at the beginning A and B.

 Number: 16 Author: Anonymous Subject: Note Date: 2016-07-29 17:33:29

---

On a single hillslope there can be patches of different processes. The question is: Do they form a continuous path between A and B?

 Number: 17 Author: Anonymous Subject: Insert Text Date: 2016-07-29 17:34:58

---

in our study catchment ...

 Number: 18 Author: Anonymous Subject: Insert Text Date: 2016-07-29 17:34:17

---

and space

 Number: 19 Author: Anonymous Subject: Note Date: 2016-07-29 17:35:31

---

patterns of what (soil moisture?)

 Number: 20 Author: Anonymous Subject: Insert Text Date: 2016-07-29 17:36:53

---

in Australia





rainfall-runoff response at seasonal and event based time scales. We also examine the relative role of saturation excess and subsurface flow in generating peak runoff rates and event volumes. Finally we examine circumstances under which rainfall intensity plays a role in runoff generation responses. The field site is a small agricultural catchment in the Lang Lang River catchment, Victoria, Australia, which we examine through the lens of hydrometric and isotope and geochemistry measurements. These results are used to propose a conceptual model of the processes and pathways that contribute event runoff as catchment wetness and rainfall intensity vary.

## 2 Methods

### 2.1 Study location

The study site is a 1.37 ha hillslope (RBF) located on a dairy farm at Poowong East, in the Lang Lang River Catchment, Victoria, Australia, 130 km south-east of Melbourne (Figure 2). A general description of the study catchment can be found in Adams et al. (2014). The study period was between September 2009 and December 2011. Elevation ranges from 160 to 210 mAHD and the slope varies from 2% to 50%. Based on field observations and the hydrologic behaviour, the hillslope was divided into four different zones: 1) the riparian area located on the relatively flat convergent lower part of the hillslope (outlined in black on Figure 2) included sites 1, 2, 32 and 3; 2) the lower slope (low slope) area; 3) the mid slope area with sites 4, 5, 6 and 7; and 4) the upper slope (upslope) area with sites 10, 11 and 15 (Figure 2).

Figure 2 goes about here

The study area has a humid climate and rainfall is reasonably uniformly distributed across the year with an annual mean (1961-1990) of 1100 mm (Bureau of Meteorology, 2009). Annual areal potential evapotranspiration is 1040 mm (Bureau of Meteorology, 2005). The catchment geology comprises of sandstones and mudstones of the Cretaceous Strezlecki Group (VRO, 2013). Outcrops on the lower stream banks of the catchment (just downstream of the monitored hillslope) show weathered sandstone and mudstone bedrock. Hand augering revealed a soil depth of  $\leq 1.5-1.6$  m and the lower parts of the profile included mottled clay and weathered bedrock particles. The soils are acidic and mesotrophic brown dermosols (Isbell, 2002). Soil profile depth decreases moving downslope. These soils typically have a moderate hydraulic conductivity surface horizon ( $0.4$  m,  $K_s \approx 5 * 10^{-6} \text{ m s}^{-1}$ , about  $20 \text{ mm hr}^{-1}$ ). The dominant land use is grazing by dairy cows.

### 2.2 Site instrumentation and hydrometric data monitoring

Rainfall data were recorded using a  $0.2$  mm tipping-bucket raingauge at an automatic weather station which was installed in 2010 at the top of RBF. A rainfall sampler (Kennedy et al., 1979) collected up to ten sequential rainfall samples, each being equivalent to 6.6 mm of rainfall. The sampler was initially installed close to the AWS, however, due to instances of damage by animals, it was relocated near to the flume in August 2010 until the end of the study period. A trapezoidal flume was installed at the riparian zone outlet and an Odyssey (Dataflow Systems inc. Christchurch, NZ) pressure transducer (PT)

## Page:4

 Number: 1 Author: Anonymous Subject: Note Date: 2016-07-29 17:38:22

---

do you mean runoff generation response or dominant runoff mechanism?

 Number: 2 Author: Anonymous Subject: Note Date: 2016-07-29 19:06:10

---

In general: the individual sections could improve from the order in which facts are stated.  
Please provide more quantitative information (e.g. soil profile), total number of Q, GW, NS, monitoring sites  
be more specific about which instruments have been used to analyze water samples.  
Where did you manually take samples, how often and when?  
How did you determine the saturated area?

 Number: 3 Author: Anonymous Subject: Note Date: 2016-07-29 18:04:26

---

Is this the catchment name? If so please write out the full name once and put the abbr. behind.

 Number: 4 Author: Anonymous Subject: Note Date: 2016-07-29 17:55:19

---

groundwater?

 Number: 5 Author: Anonymous Subject: Note Date: 2016-07-29 17:55:53

---

groundwater, streamflow?

 Number: 6 Author: Anonymous Subject: Note Date: 2016-07-29 17:57:12

---

please describe the criteria you used to define these zones (range of slope values, TWI, etc.)

 Number: 7 Author: Anonymous Subject: Note Date: 2016-07-29 17:57:52

---

(1961 - 1990 ?)

 Number: 8 Author: Anonymous Subject: Strikeout Date: 2016-07-29 17:58:18

---

 Number: 9 Author: Anonymous Subject: Note Date: 2016-07-29 17:59:29

---

... at all groundwater wells ?

 Number: 10 Author: Anonymous Subject: Note Date: 2016-07-29 18:00:14

---

please be clear if this is the average soil depth, the range ...

 Number: 11 Author: Anonymous Subject: Note Date: 2016-07-29 18:01:29

---

What about the other horizons. Is there an impeding soil layer at what depth?

 Number: 12 Author: Anonymous Subject: Note Date: 2016-07-29 18:10:40

---

section needs better ordering. E.g, if you start with rainfall, then continue with all other meteorological parameters. Consider to start with the parameters that are most relevant.

 Number: 13 Author: Anonymous Subject: Strikeout Date: 2016-07-29 18:03:40

---

 Number: 14 Author: Anonymous Subject: Note Date: 2016-07-29 18:05:00

---

per event, day, season?

 Number: 15 Author: Anonymous Subject: Note Date: 2016-07-29 18:05:34

---

please provide full name!



rainfall-runoff response at seasonal and event based time scales. We also examine the relative role of saturation excess and subsurface flow in generating peak runoff rates and event volumes. Finally we examine circumstances under which rainfall intensity plays a role in runoff generation responses. The field site is a small agricultural catchment in the Lang Lang River catchment, Victoria, Australia, which we examine through the lens of hydrometric and isotope and geochemistry measurements. These results are used to propose a conceptual model of the processes and pathways that contribute event runoff as catchment wetness and rainfall intensity vary.

## 2 Methods

### 2.1 Study location

The study site is a 1.37 ha hillslope (RBF) located on a dairy farm at Poowong East, in the Lang Lang River Catchment, Victoria, Australia, 130 km south-east of Melbourne (Figure 2). A general description of the study catchment can be found in Adams et al. (2014). The study period was between September 2009 and December 2011. Elevation ranges from 160 to 210 mAHD and the slope varies from 2% to 50%. Based on field observations and the hydrologic behaviour, the hillslope was divided into four different zones: 1) the riparian area located on the relatively flat convergent lower part of the hillslope (outlined in black on Figure 2) included sites 16, 1, 2, 32 and 3; 2) the lower slope (low slope) area; 3) the mid slope area with sites 4, 5, 6 and 7; and 4) the upper slope (upslope) area with sites 10, 11 and 15 (Figure 2).

Figure 2 goes about here

The study area has a humid climate and rainfall is reasonably uniformly distributed across the year with an annual mean (1961-1990) of 1100 mm (Bureau of Meteorology, 2009). Annual areal potential evapotranspiration is 1040 mm (Bureau of Meteorology, 2005). The catchment geology comprises of sandstones and mudstones of the Cretaceous Strezlecki Group (VRO, 2013). Outcrops on the lower stream banks of the catchment (just downstream of the monitored hillslope) show weathered sandstone and mudstone bedrock. Hand augering revealed a soil depth of  $\leq 1.5-1.6$  m, and the lower parts of the profile included mottled clay and weathered bedrock particles. The soils are acidic and mesotrophic brown dermosols (Isbell, 2002). Soil profile depth decreases moving downslope. These soils typically have a moderate hydraulic conductivity surface horizon (0-40 cm,  $K_s \approx 5 * 10^{-6} \text{ m s}^{-1}$ , about 20 mm hr<sup>-1</sup>). The dominant land use is grazing by dairy cows.

### 2.2 Site instrumentation and hydrometric data monitoring

Rainfall data were recorded using a 0.2 mm tipping-bucket raingauge at an automatic weather station which was installed in 2010 at the top of RBF. A rainfall sampler (Kennedy et al., 1979) collected up to ten sequential rainfall samples, each being equivalent to 6.6 mm of rainfall. The sampler was initially installed close to the AWS, however, due to instances of damage by animals, it was relocated near to the flume in August 2010 until the end of the study period. A trapezoidal flume was installed at the riparian zone outlet and an Odyssey (Dataflow Systems inc. Christchurch, NZ) pressure transducer (PT)

give site number



recorded water levels every 10 minutes, which were used to compute instantaneous flow rates. After August 2011, the PT was replaced with an ISCO (Teledyne ISCO, Lincoln, NE, USA), model 730 bubbler.

An auto sampler (Teledyne ISCO 6712) was installed at the outlet of RBF and was triggered based on the rising stage and programmed to collect up to 24 samples at hourly intervals. Samples were collected from the auto sampler within 48 hours.

5 To reduce the laboratory analysis workload, the flow hydrograph was graphed in the field prior to event sample collection. All samples during the rising limb and the peak were collected and samples were typically selected at an interval of 4 hours during the falling limb. Routine grab sampling was undertaken at weekly intervals during the main runoff season when water was flowing through the RBF flume. This was supplemented by additional grab sampling during visits to collect event samples from the auto sampler.

10 Weather variables (temperature, humidity, wind, rainfall, global radiation) were measured by the automatic weather station. Areal potential evapotranspiration (APET) was also computed using the Morton (1983) wet environment method on a daily basis. APET was strongly seasonal resulting in strongly seasonal soil moisture contents and intermittent streamflow at RBF. Hourly volumetric water content (VWC) was measured at 0-30 cm and 30-60 cm depths using vertically installed 30 cm long Campbell Scientific CS625 probes (Campbell Scientific, 2006) situated close to the AWS. The soil moisture sensor data were corrected for soil temperature which was also measured close to the AWS.

15 To define the nature of hydrologic connectivity, runoff mechanisms and flow pathways, shallow (1.5-1.6 m) groundwater wells were installed across the RBF hillslope using 40 mm PVC pipes and backfilled with sand, bentonite, the topsoil and grass. Figure 2 shows these sites of which 1, 2, 3, 16 and 32 were in the riparian zone; 4, 5, 6 and 7 were on the mid slope; and 10, 11 and 15 were on the upper slope. Sites 4, 5 and 6 were equipped with water level loggers from July 2010, and sites 3, 7, 16 and 32 were logged from winter 2011. Water levels were logged using Odyssey PT loggers.

### 2.3 Water sample analysis

Sub-samples were taken of stream water from both manual and auto sampler samples, and from all full rainfall sample bottles; these were collected in glass bottles for isotope analysis. Bottles were completely filled. The samples were refrigerated (+ 4°C) until analysis for  $\delta^{18}\text{O}$  and  $\delta^2\text{H}$ , either by the Monash University Earth Sciences laboratory or by Professor Russell Drysdale's isotope laboratory at the University of Melbourne, where a Picarro cavity ring-down isotope analyser was used to determine isotope ratios. The uncertainty in results was  $\delta^{18}\text{O}=0.1\%$  and  $\delta^2\text{H}=0.4\%$ . Sub-samples were also taken from each water sample for selected major ion ( $\text{Na}^+$ ,  $\text{K}^+$ ,  $\text{Ca}^{2+}$ ,  $\text{Mg}^{2+}$  and  $\text{Cl}^-$ ) analyses, which were analysed in the NATA-certified, analytical chemistry laboratory of the Water Studies Centre at Monash University using standard methods.

## Page:5

- 
-  **Number: 1** Author: Anonymous Subject: Note Date: 2016-07-29 18:06:58  
with what equation (give a citation)
- 
-  **Number: 2** Author: Anonymous Subject: Note Date: 2016-07-29 18:19:25  
sampling what (I guess streamflow)  
So you had one site with water samples?
- 
-  **Number: 3** Author: Anonymous Subject: Note Date: 2016-07-29 18:08:53  
how did you know the hydrograph before the event? Unclear please rewrite.
- 
-  **Number: 4** Author: Anonymous Subject: Note Date: 2016-07-29 18:09:22  
interval for the sampling?
- 
-  **Number: 5** Author: Anonymous Subject: Note Date: 2016-07-29 18:13:23  
how did you measure the lower range when the probe is 30 cm? Pits? If so, describe their installation procedure
- 
-  **Number: 6** Author: Anonymous Subject: Note Date: 2016-07-29 18:11:38  
soil water content?
- 
-  **Number: 7** Author: Anonymous Subject: Note Date: 2016-07-29 18:17:55  
please state clearly how many Q, GW, SM sites you had.
- 
-  **Number: 8** Author: Anonymous Subject: Note Date: 2016-07-29 18:15:36  
... until 20xx
- 
-  **Number: 9** Author: Anonymous Subject: Note Date: 2016-07-29 18:17:18  
I think Odyssey are not pressure transducers!
- 
-  **Number: 10** Author: Anonymous Subject: Note Date: 2016-07-29 18:16:00  
until 20xx (state the duration you were analysing!)
- 
-  **Number: 11** Author: Anonymous Subject: Note Date: 2016-07-29 18:20:33  
You need t say more about the manual sampling. Where, how often, at what times in streamflow, in gw?
- 
-  **Number: 12** Author: Anonymous Subject: Note Date: 2016-07-29 18:23:29  
Please state exactly which instruments you used (not the Professor).  
If you used different machines but pooled the data for the analysis you have to somehow say something about potential differences (best you state which samples were analyzed where or at least sampels from 2010 ... and 2011 ...
- 
-  **Number: 13** Author: Anonymous Subject: Note Date: 2016-07-29 18:23:58  
How is this determined?
- 
-  **Number: 14** Author: Anonymous Subject: Note Date: 2016-07-29 18:24:50  
which ones and which machines



## 2.4 Rainfall and runoff events

In order to analyse event behaviour, it was necessary to identify rainfall and runoff events. Based on an examination of the time series of hourly rainfall in the catchment, rain events were defined as having  $\geq 5$  mm total rainfall, and peak hourly rainfall intensity,  $I_{peak} \geq 1.5$  mm hr<sup>-1</sup>. Distinct events were separated by  $> 12$  hours without rainfall.

5 The runoff hydrograph was also divided into events. Runoff events began when the hydrograph started to rise from its initial low flow value or moved above a threshold of 0.05 mm hr<sup>-1</sup> following the commencement of a rainfall event. Events ended either when: 1) the flow returned to its initial value; 2) a new rainfall event started; or, 3) 96 hours after the end of the rainfall event in unusually wet situations where elevated flow continued. For each event, a number of characteristics were determined as shown in Tables 1 and 2.

10 The antecedent soil moisture condition (ASD) was represented using the soil water storage in the top 60 cm of the profile at the AWS at the start of each rainfall event. Saturated area extent was estimated based on manual measurements of the upstream extent of the saturated area (see Figure 2 for the maximum boundary location at site 3) in the field between events, combined with GIS information. The saturated area is topographically constrained in the lateral direction. The proportion of saturated area was estimated using these data and then used to estimate saturation excess runoff generation for the different events. In this study we separate return flow and flow resulting from direct precipitation on the saturated area and use Saturation excess Overland Flow (SOE) to refer to the latter. The event runoff depth (mm) and event runoff coefficient (RC %) were calculated by separating the event hydrograph using the method of (Hewlett and Hibbert, 1967), which has been widely applied (Buttle et al., 2004; Fujimoto et al., 2008; McGuire and McDonnell, 2010). The method assumes that baseflow increases at the rate of 0.55 l s<sup>-1</sup> km<sup>2</sup> h<sup>-1</sup> (0.002 mm hr<sup>-1</sup>) from the start of the rising limb.

## 20 3 Results

The following results first provide an overview of the seasonal behaviour and rainfall-runoff events. They then examine whether thresholds in the antecedent conditions and/or event rainfalls exist. Next, links between the hillslope condition and the event runoff are examined using the piezometer and soil moisture data. After that, the recession behaviour of events is examined and linked to hillslope wetness conditions. Finally isotope and major ion data are presented for selected events.

### 25 3.1 Overview of runoff behaviour and rainfall-runoff event characteristics

Figure 3 shows time series of weekly rainfall, APET, soil water storage and runoff. The rainfall, although variable from week-to-week, exhibited little seasonality, while there was strong seasonality in PET. This drove a strong seasonality in soil water storage. An examination of the weekly runoff data shows that there was generally no flow from about October to May due to the seasonal nature of this catchment; however, an exception was that persistent low flow occurred from 26 November 2011 to the end of the event on 10 December 2011. During this period ASD was often relatively low but there was frequent and substantial rainfall ( $> 200$  mm in 30 days). While a strong link between runoff and soil water storage is evident in Figure

 Number: 1 Author: Anonymous Subject: Note Date: 2016-07-29 18:41:32

---

state the duration of the study period

 Number: 2 Author: Anonymous Subject: Note Date: 2016-07-29 19:25:40

---

I think stating ASI needs also to state a duration over which ASI is calculated. If it is the VWC at the start of an event, than it is not typically called ASI. Please define!

 Number: 3 Author: Anonymous Subject: Note Date: 2016-07-29 18:33:34

---

not clear from Fig. 2. Also not clear, if you did this during each events. Was it based on mapping?

Was it saturated area or the extent of the channel?

 Number: 4 Author: Anonymous Subject: Note Date: 2016-07-29 18:34:30

---

by multiplying the area with ...

 Number: 5 Author: Anonymous Subject: Note Date: 2016-07-29 18:35:23

---

How can you do that unless you are mapping the catchment. Please describe very clearly.

 Number: 6 Author: Anonymous Subject: Note Date: 2016-07-29 18:36:14

---

I like the idear of giving definition. Please can you do that in the introduction and for all processes you are referring to!

 Number: 7 Author: Anonymous Subject: Note Date: 2016-07-29 18:37:54

---

is this approach also applicable in your catchment?

 Number: 8 Author: Anonymous Subject: Note Date: 2016-07-30 13:49:39

---

Summary of general comments:

Result section is very descriptive and lacks statistical/data analysis. Some results are based on one or a few selected events only. I suggest to exploit the nice dataset the authors have at ahdn and calculated statistics over many events to derive generally applicable results.

Results (e.g. thresholds) are "read" from graphs and not calculated from the dataset.

Result section contains parts, that are better suited in the discussion section because they are subject to the authors interpretation and not based on data only.

Terms are either not defined in the text (e.g., in the method section) or not used consistently.

The term "threshold" is used in circumstances where an exponential relation is more appropriate.

As the different runoff mechanisms are prominent in the title, they should be clearer addressed in the results

 Number: 9 Author: Anonymous Subject: Strikeout Date: 2016-07-29 18:42:46

---

 Number: 10 Author: Anonymous Subject: Note Date: 2016-07-29 18:43:45

---

define ASI the first time you use it!

 Number: 11 Author: Anonymous Subject: Note Date: 2016-07-29 18:44:43

---

quantify?



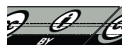

3, there are exceptions. For example in February 2011, there was a runoff response despite the catchment being near to the lowest soil water storage for the study period. 

Figure 3 goes about here

Moving to the event timescale, Table 1 summarises 38 rainfall-runoff events and Table 2 shows a summary of 22 rainfall  
5 events that did not produce a runoff response. A further 16 rainfall events occurred over the study period which are not included in the analysis due to missing runoff data. For the 38 runoff events, total event rainfall varied from 7 to 72 mm,  $I_{peak}$  ranged from 2 to 31 mm hr<sup>-1</sup>, ASI ranged from 130 to 286 mm and total event runoff varied between 0.23 and 41 mm. For the no-flow events (Table 2), total rainfall varied from 5 to 28 mm,  $I_{peak}$  ranged from 2 to 10 mm hr<sup>-1</sup> and ASI ranged from 146 to 238 mm. Figure 4 shows rainfall-runoff responses for selected events at RBF. These graphs are ordered from lowest  
10 (27/11/2010) to highest ASI (7/6/2011) for the selected events. Most of the events presented in Figure 4 had zero or very low initial flow. 

Table 1 goes about here

Table 2 goes about here

Figure 4 goes about here

15 In Figure 4 most  showed rapid response to rainfall, except for the event on 12/11/2010 which did not produce any runoff and the event on 7/6/2011. The events on 27/11/2010 and 10/12/2011 in particular showed a very flashy response. These events had the highest peak  rainfall intensity during the study period and they occurred at the end of the flow season with low ASI (for the characteristics of these events see Table 1). The highest peak runoff rates for the study period were for the events on 27/11/2010 and 10/12/2011, which were 2.4 and 5.6 mm hr<sup>-1</sup>, respectively. In contrast to most events,  
20 the runoff response for the event on 27/11/2010 was transient with very rapid recession. For the event on 10/12/2011, a second peak of moderate rainfall intensity (about 10 mm hr<sup>-1</sup>) produced a second runoff peak and there was a more significant recession flow following the rainfall bursts. This was also true for the other events shown in Figure 4, which were typical of responses to lower intensity rainfall during wetter (in terms of soil water) periods.

For events with  $I_{peak} < 10$  mm hr<sup>-1</sup> there was a general increase in response as the ASI increased. The event on 12/11/2010  
25 had 184 mm ASI and total rainfall was 28 mm and it did not produce any runoff. This was a typical example of no flow events. Coming into the runoff season, as ASI increased (e.g. 220 mm on 11/5/2011), RBF started to respond gradually, producing small amounts of runoff (e.g. for events on 11/5/2011 and 14/5/2011). When the ASI was > 250 mm for the event on 7/6/2011, it can be clearly seen that RBF responded to this low intensity, small size rainfall event with a delayed and smooth flow hydrograph with continued flow following the event. This also occurred for the next event on 1/8/2010.

### 30 3.2 Runoff thresholds

In Figure 1 we set out a number of thresholds that are important in runoff production mechanisms. We now explore the event data from the perspective of thresholds, concentrating on two key ones: catchment wetness and rainfall intensity. Figure 5  
builds on approaches by Detty and McGuire (2010) and Janzen and McDonnell (2015).  Figure 5a shows event runoff as a

## Page:7

 Number: 1 Author: Anonymous Subject: Note Date: 2016-07-29 18:46:08

---

the overall seasonal pattern is the same but details not!

 Number: 2 Author: Anonymous Subject: Note Date: 2016-07-29 18:48:51

---

which ones?

 Number: 3 Author: Anonymous Subject: Note Date: 2016-07-29 18:52:31

---

whcih ones! fable them with a,b,c, so you can refer to them

 Number: 4 Author: Anonymous Subject: Note Date: 2016-07-29 18:54:06

---

give value in ()

 Number: 5 Author: Anonymous Subject: Note Date: 2016-07-29 18:57:48

---

that does what?



function of event rainfall, with the highest hourly rainfall intensity indicated by colour. Acknowledging that we have excluded rainfall events below 5 mm total rainfall, essentially any rainfall depth could produce a response at the catchment outlet, but there was a wide variation in runoff coefficients (indicated by the scatter). It is also clear that the events with high peak hourly intensity also had relatively large total rainfall accumulations.

5 Figure 5 goes about here

Figure 5b shows the impact of five factors together. The cumulative curve shows the distribution of soil water storage as observed through the study period. Specific events are shown with the ASI identified (left hand end of the grey lines) and the ASI plus rainfall depth (filled markers at the right end of the grey lines). The length of the lines is the rainfall depth. The colour shows the peak hourly rainfall intensity ( $I_{peak}$ ) and the size of the bubbles shows the quick flow runoff coefficient.

10 Squares indicate events that did not produce any runoff or where the peak runoff rate was less than  $0.05 \text{ mm hr}^{-1}$ . There are several trends that can be discerned from Figure 5b. Rainfall events occurred across the full range of catchment wetness and were relatively evenly spread. The larger rainfall events generally occurred when  $ASI < 250 \text{ mm}$  and a mix of low and high intensity events occurred for these conditions. All the events on a wet catchment ( $ASI > 250 \text{ mm}$ ) had low ( $\leq 6.2 \text{ mm hr}^{-1}$ ). Events where the ASI plus rainfall was less than 250mm usually did not generate any runoff, although there were some high intensity exceptions and a small number of events with very low runoff coefficients (1-4%) where the ASI plus rainfall was generally between 240 and 250mm. These low runoff coefficient events were at the end of the runoff season.

Figures 5c and 5d look at the role of catchment wetness at the start (5c) and end (5d) of the event, combined with rainfall intensity. The bubble size shows the quick flow runoff coefficient as before, and crosses indicate rainfall events that did not produce runoff. Colour indicates the runoff volume. The runoff behaviour is separated into groups more clearly in

20 Figure 5d than in 5c. There are essentially three different groups including: 1) events without runoff where  $ASI + Rain < 250 \text{ mm}$  and  $I_{peak} < 10 \text{ mm hr}^{-1}$ ; 2) events that produce runoff when  $ASI + Rain > 250 \text{ mm}$ ; and 3) events with  $ASI + Rain < 250 \text{ mm}$  and  $I_{peak} > 15 \text{ mm hr}^{-1}$  that did produce runoff (Tables 1 and 2). Where the ASI plus event rainfall exceeded 250 mm (group 2), some runoff was always produced.

Both of the first and third groups had ASI plus event rainfall less than 250 mm but they behaved differently in that some produced runoff and others did not. In the first group low intensity rainfalls mostly happened in drier periods when ASI varied between 146 and 227 mm. These rainfall events completely infiltrated into the soil and they did not produce runoff (see Table 2 for event characteristics).

The third group, including events on 27/11/2010, 4/2/2011 and 10/12/2011, occurred during dry periods at the end of the flow season when the ASI was  $< 200 \text{ mm}$ . These events were distinguished by having maximum hourly rainfall intensities above  $\sim 15 \text{ mm hr}^{-1}$  and they did produce runoff. In particular, two of these events on 27/11/2010 and 10/12/2011 had the highest rainfall intensities observed ( $I_{peak} > 30 \text{ mm hr}^{-1}$ ) and they produced the highest peak runoff rates ( $8.1 \text{ mm hr}^{-1}$  and  $9.1 \text{ mm hr}^{-1}$ ) and hourly runoff totals (2.4 and 5.6 mm) observed during the study period (Figure 3). These runoff peaks were synchronous with the highest rainfall intensities. Antecedent flow for the events on the 27/11/2010 and 4/2/2011 was zero and the hydrograph rose and recessed quickly. For the event on the 10/12/2011, the ASI was 192 mm, the total rainfall was

## Page:8

 Number: 1 Author: Anonymous Subject: Note Date: 2016-07-29 18:59:33

---

its not the RC but the Total Runoff

 Number: 2 Author: Anonymous Subject: Note Date: 2016-07-29 19:00:48

---

Fig 5a could be described more. What about the relation with intensity?

 Number: 3 Author: Anonymous Subject: Note Date: 2016-07-29 19:18:56

---

Fig 5b. needs much better explanation (consider to reduce information to make more clear).

 Number: 4 Author: Anonymous Subject: Note Date: 2016-07-29 19:16:44

---

I like the figure but it has (too) many information in one plot in order to deliver your message.

readability:

Where can I quantify what the length of the grey line is? Where is zero for each individual line?

 Number: 5 Author: Anonymous Subject: Note Date: 2016-07-29 19:17:55

---

but your legend suggest that the filled marker is RC?

 Number: 6 Author: Anonymous Subject: Note Date: 2016-07-29 19:26:49

---

use other expression

 Number: 7 Author: Anonymous Subject: Note Date: 2016-07-29 19:22:52

---

How much of Fig. 5b is actually describing the general seasonal pattern in rainfall event types?

 Number: 8 Author: Anonymous Subject: Insert Text Date: 2016-07-29 19:21:10

---

rainfall events that state

 Number: 9 Author: Anonymous Subject: Note Date: 2016-07-29 19:27:28

---

the role on what?

 Number: 10 Author: Anonymous Subject: Note Date: 2016-07-29 19:31:24

---

(quantified as ASI and ASI+ Rain)

 Number: 11 Author: Anonymous Subject: Note Date: 2016-07-29 19:29:44

---

(RC)

 Number: 12 Author: Anonymous Subject: Note Date: 2016-07-29 19:35:22

---

say also that the y-axis is Ipeak (Fig 5 c , d)

 Number: 13 Author: Anonymous Subject: Note Date: 2016-07-29 19:37:09

---

are these three groups statistically significant. It "looks" promising, they are!

 Number: 14 Author: Anonymous Subject: Note Date: 2016-07-29 19:34:53

---

why? Guide the reader to your thoughts.

 Number: 15 Author: Anonymous Subject: Strikeout Date: 2016-07-29 19:39:16

---

 Number: 16 Author: Anonymous Subject: Note Date: 2016-07-29 19:43:49

---



function of event rainfall, with the highest hourly rainfall intensity indicated by colour. Acknowledging that we have excluded rainfall events below 5 mm total rainfall, essentially any rainfall depth could produce a response at the catchment outlet, but there was a wide variation in runoff coefficients (indicated by the scatter). It is also clear that the events with high peak hourly intensity also had relatively large total rainfall accumulations.

5 Figure 5 goes about here

Figure 5b shows the impact of five factors together. The cumulative curve shows the distribution of soil water storage as observed through the study period. Specific events are shown with the ASI identified (left hand end of the grey lines) and the ASI plus rainfall depth (filled markers at the right end of the grey lines). The length of the lines is the rainfall depth. The colour shows the peak hourly rainfall intensity ( $I_{peak}$ ) and the size of the bubbles shows the quick flow runoff coefficient.

10 Squares indicate events that did not produce any runoff or where the peak runoff rate was less than  $0.05 \text{ mm hr}^{-1}$ . There are several trends that can be discerned from Figure 5b. Rainfall events occurred across the full range of catchment wetness and were relatively evenly spread. The larger rainfall events generally occurred when  $ASI < 250 \text{ mm}$  and a mix of low and high intensity events occurred for these conditions. All the events on a wet catchment ( $ASI > 250 \text{ mm}$ ) had low ( $\leq 6.2 \text{ mm hr}^{-1}$ ). Events where the ASI plus rainfall was less than 250mm usually did not generate any runoff, although there were some high intensity exceptions and a small number of events with very low runoff coefficients (1-4%) where the ASI plus rainfall was generally between 240 and 250mm. These low runoff coefficient events were at the end of the runoff season.

Figures 5c and 5d look at the role of catchment wetness at the start (5c) and end (5d) of the event, combined with rainfall intensity,  $I_{peak}$ . The bubble size shows the quick flow runoff coefficient as before, and crosses indicate rainfall events that did not produce runoff. Colour indicates the runoff volume. The runoff behaviour is separated into groups more clearly in

20 Figure 5d than in 5c. There are essentially three different groups including: 1) events without runoff where  $ASI + Rain < 250 \text{ mm}$  and  $I_{peak} < 10 \text{ mm hr}^{-1}$ ; 2) events that produce runoff when  $ASI + Rain > 250 \text{ mm}$ ; and 3) events with  $ASI + Rain < 250 \text{ mm}$  and  $I_{peak} > 15 \text{ mm hr}^{-1}$  that did produce runoff (Tables 1 and 2). Where the ASI plus event rainfall exceeded 250 mm (group 2), some runoff was always produced.

Both of the first and third groups had ASI plus event rainfall less than 250 mm but they behaved differently in that some produced runoff and others did not. In the first group low intensity rainfalls mostly happened in drier periods when ASI varied between 146 and 227 mm. These rainfall events completely infiltrated into the soil and they did not produce runoff (see Table 2 for event characteristics).

The third group, including events on 27/11/2010, 4/2/2011 and 10/12/2011, occurred during dry periods at the end of the flow season when the ASI was  $< 200 \text{ mm}$ . These events were distinguished by having maximum hourly rainfall intensities above  $\sim 15 \text{ mm hr}^{-1}$  and they did produce runoff. In particular, two of these events on 27/11/2010 and 10/12/2011 had the highest rainfall intensities observed ( $I_{peak} > 30 \text{ mm hr}^{-1}$ ) and they produced the highest peak runoff rates ( $8.1 \text{ mm hr}^{-1}$  and  $9.1 \text{ mm hr}^{-1}$ ) and hourly runoff totals (2.4 and 5.6 mm) observed during the study period (Figure 3). These runoff peaks were synchronized with the highest rainfall intensities. Antecedent flow for the events on the 27/11/2010 and 4/2/2011 was zero and the hydrograph rose and recessed quickly. For the event on the 10/12/2011, the ASI was 192 mm, the total rainfall was

what do you mean by synchronized (peak timing?)

 Number: 17 Author: Anonymous Subject: Note Date: 2016-07-29 19:44:15  
steaflo?

---



53 mm, with an initial flow of  $0.13 \text{ mm hr}^{-1}$  (Table 1). It produced the highest observed peak hourly runoff of 5.6 mm, the runoff duration was 32 hours and total runoff was 41 mm. The highest intensity was observed in the first two hours of the event and 18% of the rainfall had become runoff by the end of those 2 hours. This compared to a maximum surface saturated extent of about 6% of the catchment area. The event on 10/12/2011 marked the end of a particularly rainy period, with more than 200 mm over 30 days. Note that due to equipment being removed after this event, this event was the last recorded flow event at RBF.

### 3.3 Evidence for runoff processes and thresholds

The above presentation of results from Figure 5d identifies a threshold catchment wetness expressed as antecedent soil water storage plus event rainfall depth of 250 mm above which runoff always occurred and another threshold of hourly rainfall depth exceeding 15 mm which also led to runoff production. Looking at events in the lower right quarter of Figure 5d also shows that the event runoff coefficient tends to increase as either catchment wetness or peak hourly intensity increases. These results suggest that there are both a wetness dependent and an intensity dependent runoff production mechanisms operating. This section examines the evidence for different runoff mechanisms contributing to event runoff.

#### 3.3.1 Hillslope wetness-flow response relationships

Figure 6 shows the runoff time series together with water level time series at several shallow piezometers; sites 4, 5, 3, 32, 2 and 1 (Figure 2). All sites except 4 were located in drainage lines. The sites are organized by elevation from highest to lowest in the catchment. Manually read sites are shown with dashed lines. Figure 6 clearly shows that the duration of saturation increased downslope. Comparing the runoff time series with the piezometer record for sites 1, 2 and 32, it is clear that the water table rose to the surface in the upper parts of the riparian zone during runoff events. Furthermore, the lower half of the riparian zone remained saturated to the surface for long periods during the runoff season. The record for site 3 indicates that the water table at this site did not rise to the surface, even during events.

Figure 6 goes about here

Looking at the flow record, there were periods where significant baseflow persisted between events. These correspond to periods where the water table at site 5 was above about 120 cm and at site 4 was above about 140 cm. Flow became more strongly persistent between rainfall events as the water table at sites 4 and 5 rose further. The water table recessions at sites 4 and 5 correspond with flow recessions when the water table was above 120 cm and 140 cm at sites 4 and 5, respectively. Figure 7 shows the relationship between water table levels on the hillslope (sites 4 and 5) and soil water storage at the weather station. Site 5 in particular shows a strong change in behaviour for soil water storage above 250 mm. Above this threshold much higher water tables were typically observed and those water tables showed relatively rapid recession when shallower than 120 cm. Similar observations were seen at site 4 but the threshold depth was 140 cm. Figure 7 thus explains the linkage between the 250mm ASI plus event rainfall threshold and runoff. When soil water contents exceeded this level, water tables rose into a more permeable zone and lateral subsurface drainage occurred, as evidenced by the recessions. That

---

 Number: 1 Author: Anonymous Subject: Note Date: 2016-07-29 19:52:02

the RC calculated for the first 2 hours was 18% (is that what you wanted to say?)

---

 Number: 2 Author: Anonymous Subject: Note Date: 2016-07-29 19:53:30

You could summarize all findings in one or two sentences at the end. (also applies to other result sections)

---

 Number: 3 Author: Anonymous Subject: Strikeout Date: 2016-07-30 11:59:35

---

 Number: 4 Author: Anonymous Subject: Note Date: 2016-07-30 10:23:12

You need to calculate the actual value. In the discussion it is OK to round it to a meaningful value.

---

 Number: 5 Author: Anonymous Subject: Note Date: 2016-07-30 10:26:57

This is based on 4 datapoints and you have a gap in data between ca. 10 and 15 mm total rainfall. I think it is valid to state the 15 mm threshold but you need to be critical about it in the text.

---

 Number: 6 Author: Anonymous Subject: Note Date: 2016-07-30 10:31:42

you need to do a statistical test to prove this (e.g., rank correlation).

---

 Number: 7 Author: Anonymous Subject: Note Date: 2016-07-30 10:36:10

what do you mean? Where they aligned along transects?

---

 Number: 8 Author: Anonymous Subject: Note Date: 2016-07-30 10:44:56

please help the reader to better understand this. Saturation would mean to me, that the entire soil profile is saturated and the groundwater level at the soil surface. That's, only the case for well 1 and 2 (maybe for 32).

---

 Number: 9 Author: Anonymous Subject: Note Date: 2016-07-30 10:38:33

What do you mean. Manually read groundwater levels? If so please state this in the method section. It seemed, you were using Odyssey loggers for all wells.

If you used irregular intervals, please use a line type that has a dot at each time you were manually taking a reading.

---

 Number: 10 Author: Anonymous Subject: Note Date: 2016-07-30 10:52:25

I think it is hard to say something about recession details then plotting 1.5 years of data (x-axis). If you want to say something about the relationship between certain groundwater levels and streamflow, you should either show selected events or even better use statistical tests that show, that streamflow is statistically higher, when certain gw-levels (e.g., in well 4 and 5) are above a threshold of XY cm. That would nicely fit your topic.

---

 Number: 11 Author: Anonymous Subject: Note Date: 2016-07-30 11:03:55

Why do you use soil water storage (or are you actually using soil moisture (VWC)?  
You compare groundwater on the hillslope with soil moisture in the riparian zone?

Why not plotting streamflow as a function of depth to groundwater or streamflow as a function of soil water storage?

---

 Number: 12 Author: Anonymous Subject: Note Date: 2016-07-30 10:56:12

Can you remind the reader that site 4 and 5 are on the hillslope

---

 Number: 13 Author: Anonymous Subject: Note Date: 2016-07-30 10:57:14

It looks like an exponential relation rather than a threshold.

---

 Number: 14 Author: Anonymous Subject: Note Date: 2016-07-30 11:05:46

This is descriptive. Please can you quantify this using statistics using all your events.





53 mm, with an initial flow of  $0.13 \text{ mm hr}^{-1}$  (Table 1). It produced the highest observed peak hourly runoff of 5.6 mm, the runoff duration was 32 hours and total runoff was 41 mm. The highest intensity was observed in the first two hours of the event and 18% of the rainfall had become runoff by the end of those 2 hours. This compared to a maximum surface saturated extent of about 6% of the catchment area. The event on 10/12/2011 marked the end of a particularly rainy period, with more than 200 mm over 30 days. Note that due to equipment being removed after this event, this event was the last recorded flow event at RBF.

### 3.3 Evidence for runoff processes and thresholds

The above presentation of results from Figure 5d identifies a threshold catchment wetness expressed as antecedent soil water storage plus event rainfall depth of 250 mm above which runoff always occurred and another threshold of hourly rainfall depth exceeding 15 mm which also led to runoff production. Looking at events in the lower right quarter of Figure 5d also shows that the event runoff coefficient tends to increase as either catchment wetness or peak hourly intensity increases. These results suggest that there are both a wetness dependent and an intensity dependent runoff production mechanisms operating. This section examines the evidence for different runoff mechanisms contributing to event runoff.

#### 3.3.1 Hillslope wetness-flow response relationships

Figure 6 shows the runoff time series together with water level time series at several shallow piezometers; sites 4, 5, 3, 32, 2 and 1 (Figure 2). All sites except 4 were located in drainage lines. The sites are organized by elevation from highest to lowest in the catchment. Manually read sites are shown with dashed lines. Figure 6 clearly shows that the duration of saturation increased downslope. Comparing the runoff time series with the piezometer record for sites 1, 2 and 32, it is clear that the water table rose to the surface in the upper parts of the riparian zone during runoff events. Furthermore, the lower half of the riparian zone remained saturated to the surface for long periods during the runoff season. The record for site 3 indicates that the water table at this site did not rise to the surface, even during events.

Figure 6 goes about here

Looking at the flow record, there were periods where significant baseflow persisted between events. These correspond to periods where the water table at site 5 was above about 120 cm and at site 4 was above about 140 cm. Flow became more strongly persistent between rainfall events as the water table at sites 4 and 5 rose further. The water table recessions at sites 4 and 5 correspond with flow recessions when the water table was above 120 cm and 140 cm at sites 4 and 5, respectively. Figure 7 shows the relationship between water table levels on the hillslope (sites 4 and 5) and soil water storage at the weather station. Site 5 in particular shows a strong change in behaviour for soil water storage above 250 mm. Above this threshold much higher water tables were typically observed and those water tables showed relatively rapid recession when shallower than 120 cm. Similar observations were seen at site 4 but the threshold depth was 140 cm. Figure 7 thus explains the linkage between the 250mm ASI plus event rainfall threshold and runoff. When soil water contents exceeded this level, water tables rose into a more permeable zone and lateral subsurface drainage occurred, as evidenced by the recessions. That

 Number: 15 Author: Anonymous Subject: Note Date: 2016-07-30 11:07:10

---

you only gave one Ksat, So you do you know that the lower soil horizon is less permeable (That is a reasonable assumption you could use in the discussion but not in the results section).

 Number: 16 Author: Anonymous Subject: Note Date: 2016-07-30 11:09:01

---

subsurface drainage form the hillslopes to the stream?

 Number: 17 Author: Anonymous Subject: Note Date: 2016-07-30 11:08:07

---

You base your conclusion on data of two wells?



is, the hillslope was becoming connected to the catchment outlet via subsurface flow. There were a few occasions where the water table responded strongly for soil water storage less than 250 mm. As indicated by the red colour, these corresponded to high intensity rainfall events. It is not clear exactly how the water moved rapidly into the wells in these cases but it could be due to preferential flow through macropores.

5 Figure 7 goes about here

Flow recessions provide information on the drainage characteristics of catchments. Figure 6 shows that the hillslope flow usually ceased between events during the wet period, with no flow during dry periods. However, in August and early September 2010, continuous hillslope flow endured for a month (Figure 6). There was also a marked variation in the recession behaviour during August/September 2010. To explore this, we calculated the recession constant,  $K$  (as in

10  $Q = Q_0 e^{-kt}$ ), and plotted it against soil water storage at the start of the recession for individual events within this period (Figure 8).  $K$  decreased as soil water storage increased. Considering this and the transient nature of flow during dry periods, it is clear that the wetter the catchment is, the slower the recessions are. By inference, this implies greater (perhaps more spatially extensive) subsurface connectivity is providing flows from the hillslope and maintaining catchment discharge during wetter conditions.

15 Figure 8 goes about here

### 3.3.2 Isotope and major ion results

Clearly, subsurface flow is often important in this catchment, suggesting that the event outflow would be dominated by “old” water; however, the saturated area in the lowest parts of the catchment would also be expected to produce direct flows of “new” water. Figure 9 shows an event from 12 August 2010 during the wettest part of the study period. The antecedent soil water storage at the beginning of this event was 274 mm and total rainfall was 17 mm. Stable isotope data was available for the event and is shown on Figure 9. Over the study period  $\delta^2\text{H}$  for rainfall varied between -7‰ and -83‰ and  $\delta^2\text{H}$  for low flows was highly damped. Low flow samples from the RBF flume before and after the event showed a  $\delta^2\text{H}$  of -27‰ and rainfall for this event was strongly depleted (3 samples prior to and during the event  $\delta^2\text{H} = -42, -67$  and  $-57$ ‰), compared with low flow. The runoff samples showed a very different signature in the rising limb and the peak of the hydrograph (-43‰) in comparison to antecedent low flow (-27‰). Using a two-component mixing model, we estimate that the peak contribution of new water was about 50%, and the new water contribution to the event volume was 17%, corresponding to 5% of the rainfall depth. The timing of the new water contribution matched the main rainfall burst well with relatively rapid return to the typical old water isotopic signature following the cessation of rainfall. These results suggest that precipitation on the saturated area generates direct runoff in amounts that would be expected given that the saturated area is around 5-6% of the catchment area.

30 Figure 9 goes about here

## Page:10

 Number: 1 Author: Anonymous Subject: Note Date: 2016-07-30 11:09:48

---

Can you use your isotope data to prove this?

 Number: 2 Author: Anonymous Subject: Note Date: 2016-07-30 11:10:10

---

... in Fig.xy

 Number: 3 Author: Anonymous Subject: Note Date: 2016-07-30 11:11:07

---

Please move this to the discussion section. There it is possible to speculate about potential causes.

 Number: 4 Author: Anonymous Subject: Note Date: 2016-07-30 11:21:36

---

you only measure groundwater levels and not flow.

 Number: 5 Author: Anonymous Subject: Note Date: 2016-07-30 11:22:20

---

unless you have a trench, you cannot say anything about hillslope flow.

 Number: 6 Author: Anonymous Subject: Note Date: 2016-07-30 11:27:46

---

... of streamflow (or of the groundwater levels?)

Q would indicate streamflow so you were plotting  $k$  of streamflow as a function of volumetric water content (which is also measured near the outlet of the catchment. What do we learn from this in terms of connectivity between hillslope and streams (see title)?

 Number: 7 Author: Anonymous Subject: Note Date: 2016-07-30 11:28:16

---

Please quantify!

 Number: 8 Author: Anonymous Subject: Replace Date: 2016-07-30 11:29:03

---

suggests

 Number: 9 Author: Anonymous Subject: Note Date: 2016-07-30 11:36:50

---

It is OK to show only one event in the paper but for deriving conclusions you need to analyse many events and give the statistic. You have a good data set, so please use it!

 Number: 10 Author: Anonymous Subject: Note Date: 2016-07-30 11:34:10

---

in what amounts (please check sentence to be complete)

 Number: 11 Author: Anonymous Subject: Note Date: 2016-07-30 11:34:54

---

This result is different to what you concluded from the hydrometric data.



Another interesting event is the higher intensity ( $I_{peak} = 15 \text{ mm hr}^{-1}$ ) event on 8/11/11. Major ion geochemistry data were available for this event. Figure 10a shows the typical relationship between flow and chloride concentration, with samples from this event identified by red. Figure 10b shows the time series of chloride concentration along with the hydrograph. The first and second chloride samples respectively plot above and within the typical scatter of data on Figure 10a, while the remaining samples plot well below the typical chloride concentration. Given the late spring timing of this event, the first sample probably reflects some evapoconcentration of solutes in the riparian area. The flow shows a rapid peak in response to the main rainfall burst followed by a sustained relatively low flow and a recession over the second half of the day suggestive of subsurface flow. The volume of the main peak corresponds to around 5% of the rainfall. The flow after the main peak had a surprisingly low concentration of chloride (the cluster of low concentration red points on Fig 10a), which may suggest that the higher intensity activated either overland or preferential flow paths, limiting soil contact time and leading to this low concentration.

Figure 10 goes about here

## 4 Discussion

### 4.1 Runoff mechanisms

The hydrometric data enables us to identify the important runoff mechanisms under different circumstances. The isotope and major ion geochemistry data provide further supporting evidence. The rainfall plus antecedent soil water storage threshold of 250 mm that needs to be exceeded for runoff in most circumstances shows that wetness dependent runoff processes are important, that is either saturation excess or subsurface stormflow. Shallow groundwater data combined with field mapping of surface saturated areas shows that complete profile saturation is limited to about 5% of the catchment area and this saturation is persistent over the winter-spring season. Field observations show this saturated area is highly connected to the catchment outlet and it would be expected to produce SOF. The isotope results for 12 August 2010 enabled the event runoff to be separated into new water and old water contributions. Five percent of the rainfall volume on the catchment appeared in the event runoff, which corresponds to the proportion of surface saturated area in the catchment, supporting the contention of significant saturation excess runoff from this part of the catchment, as observed elsewhere (McGlynn and McDonnell, 2003).

While saturation excess runoff undoubtedly occurs, many of the event runoff coefficients were well in excess of 5% and they approach 1 under very wet conditions (Figure 5). The event on 12 August showed substantial old water contribution, logged shallow wells show that the water table did not reach the surface on the steeper hillslope areas, even within the convergent drainage lines under very wet conditions (e.g. sites 5, 7). The recession behaviour of wells on the hillslope suggests subsurface flow is moving from the hillslope under wet conditions and the recession constant analysis shows that this connection becomes stronger as the hillslope wets beyond 250 mm of stored water. This is all consistent with a substantial contribution of subsurface flow to event runoff once the hillslope is sufficiently wet to establish connection to the riparian

---

 **Number: 1 Author: Anonymous Subject: Note Date: 2016-07-30 11:41:24**

Also here: I tis OK to show one example but you need to analyse all your events and present statistics of the general behaviour. You have a good dataset!

---

 **Number: 2 Author: Anonymous Subject: Note Date: 2016-07-30 11:39:07**

What is a typical Chloride concentration (define!)

---

 **Number: 3 Author: Anonymous Subject: Note Date: 2016-07-30 11:40:16**

Please put your interpretation in the discussion section and present only results.

---

 **Number: 4 Author: Anonymous Subject: Note Date: 2016-07-30 13:11:34**

The conclusions are drawn from one or two individual rainfall events and not logically derived from the results of this study but more based on general hydrological conceptualization.

The discussion is short and could better tie in the results of this study and critically discuss them.

I think it is good to discuss the findings in the light of Fig1. But Figure 1 is for poin- or plot scale assessments and misses out spatial (and temporal) heterogeneity across a catchment.

Fig. 1, in my opinion, also misses out connectivity and interactions between sites (e.g., run-on form uphill sites). Your idea to bring that in is good but I think it needs a separate scheme to do this because of different scales of consideration.

---

 **Number: 5 Author: Anonymous Subject: Note Date: 2016-07-30 12:03:43**

not so clear form the results

---

 **Number: 6 Author: Anonymous Subject: Note Date: 2016-07-30 12:05:04**

I think your conclusions from the isotope data are showing a contrast rather support the hydrometric data (see also your title).

---

 **Number: 7 Author: Anonymous Subject: Note Date: 2016-07-30 12:08:16**

Isn't it varying between events and seasons?

---

 **Number: 8 Author: Anonymous Subject: Note Date: 2016-07-30 12:07:45**

Please give evidence rather than your subjective field impression.

---

 **Number: 9 Author: Anonymous Subject: Note Date: 2016-07-30 12:08:46**

one event is not enough to draw conclusions from it!

---

 **Number: 10 Author: Anonymous Subject: Note Date: 2016-07-30 12:11:41**

This is rather general, please discuss, what you study contributed on new insights on multiple runoff processes occurring in parallel.



area, as has been inferred in other studies (Buttle et al., 2004; Detty and McGuire, 2010; Hewlett and Hibbert, 1967; Jencso et al., 2009; Penna et al., 2011).

Perhaps more surprisingly, there was a group of events that produced runoff under conditions of relatively low soil water content (ASI + rainfall < 250 mm) but high rainfall intensity. This suggests an intensity dependent runoff process is being triggered when rainfall exceeds some threshold for sufficient time, in this case about 15 mm of rainfall in an hour. The runoff coefficients for the four events exceeding 15 mm hr<sup>-1</sup> peak hourly intensity are 3, 12, 20 and 68% for peak hourly intensities of 16, 30, 15 and 31 mm hr<sup>-1</sup> and event rainfall + ASI of 202, 215, 257 and 245 mm respectively. Note that one of these events exceeds both the wetness and intensity thresholds. It is tempting to assume that this evidence shows surface runoff due to infiltration excess runoff, but it is also possible that the high rainfall intensities are efficiently activating macropore networks (Beven and Germann, 1982) and that the flow could be following subsurface pathways.

The hydrograph from the event on 8/11/11 (the event that exceeded both thresholds, Figure 10) shows both a rapid runoff and a delayed runoff response. The concentration of chloride was unusually low during the delayed runoff component compared with all other events with major ion data. This may suggest limited contact with the catchment soils which could occur if macropore flow was important but it is not definitive. Of the two events with peak hourly intensities around 15 mm hr<sup>-1</sup>, one also exceeded the wetness (rainfall + ASI) threshold of 250 mm and the other had a very low runoff coefficient (only 3%) and hence these two events are somewhat equivocal in terms of the importance of intensity. However, the two events with peak hourly rainfall intensities around 30 mm hr<sup>-1</sup> both produced rapid runoff responses without a significant delayed component (Figure 4) and had runoff coefficients (12 and 68%) well in excess of the surface saturated area (5%) in the catchment, showing clear evidence of the role of an intensity of 30 mm hr<sup>-1</sup>. Unfortunately isotope and major ion data were not available for those events to attempt to determine whether surface or subsurface pathways are important. Overall there is clear evidence for intensity dependent runoff mechanisms, especially for the largest 30 mm hr<sup>-1</sup> events.

In summary, the process evidence suggests a catchment where subsurface flow leads to a seasonally saturated riparian area that produces saturation excess runoff. This saturation excess is augmented by subsurface stormflow when the catchment wetness (rainfall + ASI) exceeds a 250 mm threshold. This subsurface flow exfiltrates in the riparian area. When hourly rainfalls exceed a threshold of 15-30 mm hr<sup>-1</sup>, an intensity dependent runoff process is activated that also contributes flow from the hillslope area outside the riparian zone. It is not clear whether this is a purely surface runoff process or not.

#### 4.2 Thresholds and connectivity in runoff production

We identified two important thresholds in the catchment response. The first is a wetness threshold of event rainfall plus ASI exceeding 250 mm. Under these conditions the water table approaches the surface in the riparian area and water tables rise on the hillslope into what is inferred from relatively rapid hillslope water table recessions to be a more transmissive part of the soil profile (within ~120-140 cm of the surface). We infer that the hillslope becomes connected to the riparian zone under these conditions. Similar catchment wetness thresholds for connectivity and runoff generation have been reported elsewhere (Detty and McGuire, 2010; Penna et al., 2011; Tromp-van Meerveld and McDonnell, 2006b). These have been expressed

## Page:12

 Number: 1 Author: Anonymous Subject: Note Date: 2016-07-30 12:12:17

---

Please discuss in more detail, what your study and other studies found.

 Number: 2 Author: Anonymous Subject: Note Date: 2016-07-30 12:12:48

---

unfortunately only 4 events

 Number: 3 Author: Anonymous Subject: Note Date: 2016-07-30 12:14:21

---

You used hourly data but a different temporal resolution would lead you to a different threshold. Please, discuss this issue!

 Number: 4 Author: Anonymous Subject: Note Date: 2016-07-30 12:15:03

---

better move to results

 Number: 5 Author: Anonymous Subject: Note Date: 2016-07-30 12:16:22

---

Please use evidence from your result section to better corroborate this.

 Number: 6 Author: Anonymous Subject: Note Date: 2016-07-30 12:18:25

---

You cannot conclude this from one event, only.

 Number: 7 Author: Anonymous Subject: Note Date: 2016-07-30 12:19:11

---

is it intensity or storage capacity?

 Number: 8 Author: Anonymous Subject: Note Date: 2016-07-30 12:20:37

---

A saturated area would immediately produce saturation excess overland flow if hit by a rainfall.

 Number: 9 Author: Anonymous Subject: Note Date: 2016-07-30 12:22:00

---

You assume, that "old water" is from the hillslope but you need to sample water there in order to prove this. In regards to your chosen title, I think this would be something I had expected.

 Number: 10 Author: Anonymous Subject: Note Date: 2016-07-30 12:31:56

---

I doubt if one threshold (250 mm) is very informative for two very contrasting landscape units (riparian zone and hillslope). I would assume that they have different threshold or 250 mm are more related to the hillslope.

 Number: 11 Author: Anonymous Subject: Note Date: 2016-07-30 12:32:28

---

Please give soil properties for this soil horizon in the method section.

 Number: 12 Author: Anonymous Subject: Note Date: 2016-07-30 12:33:00

---

please use your data to give evidence

 Number: 13 Author: Anonymous Subject: Note Date: 2016-07-30 12:35:48

---

I am not sure, if you analyzed wetness thresholds of connectivity. Please refer to your data to do so. I think it is rather an assumption, that if we see runoff response (of "old water") in the stream we think it is from the hillslope.





either in terms of rainfall depth, antecedent soil water storage conditions, or a combination of these. Similar to our results, in a study of a forested subcatchment with highly permeable soils and a small riparian area (Detty and McGuire, 2010) found a ~~very strong~~ relationship between a threshold of 316 mm for ASI plus rain and the start of the event flow from the hillslope and demonstrated that the ASI+rainfall threshold corresponded with a water table height threshold. They also suggested that subsurface flow, transmissivity feedback and preferential flow can be used to explain runoff mechanisms. They did not observe either Hortonian overland flow or SOF even during the largest events.

In other studies, total rainfall has been found to be the main controller of threshold behaviour (Fujimoto et al., 2008; McGuire and McDonnell, 2010). Analysing 147 rain events in the Panola catchment, USA, Tromp-van Meerveld and McDonnell (2006b) defined an event precipitation depth threshold of 55 mm for initiation of connectivity and subsurface runoff. They (Tromp-van Meerveld and McDonnell, 2006a) proposed the “fill and spill” mechanism and suggested that subsurface connection happens through connectivity of transient bedrock perched areas when depression storage of bedrock fills and water spills over micro-topographic relief. Figure 5a shows that total rainfall is a poor predictor of runoff behaviour in our case.

A second threshold related with high rainfall intensities was also evident. A similar role of intensity has also been observed by Janzen and McDonnell (2015) who found that the Panola hillslope can produce significant runoff from dry antecedent conditions when high intensity rainfall occurs. In general event runoff from Panola is controlled by catchment wetness, similar to our hillslope. These are the only two studies we know of that have reported intensity thresholds in catchments where runoff is normally dominated by wetness thresholds. This may be a consequence of such events being relatively rare in any given catchment (roughly 10% of runoff producing events in our case).

### 4.3 Runoff processes framework

We now consider the three runoff processes occurring in the catchment in relation to the framework proposed in Figure 1 and the various flux and timescale thresholds identified therein. Essentially Figure 1 is posing a series of questions that allow us to systematically think through the runoff processes. Above we have identified three groups of events – those that do not produce runoff, those that produce runoff by saturation excess and subsurface stormflow from a wet catchment and those that produce runoff from higher intensity events.

The rainfall events that do not produce runoff are not exceeding infiltration capacity for sufficient time for runoff to flow from the catchment (box 1, “No”). They may or may not produce significant percolation (box 2) but if any of these events do produce percolation to a perched water table, this only results in an ephemeral water table that dissipates before lateral flow can move water down the hillslope (box 3, “No”) and they do not saturate the full profile (box 4, “No”). As a consequence no event runoff is produced. These conditions correspond to the local control state of Grayson et al. (1997).

Some high intensity rainfall events on a dryer catchment do exceed the infiltration capacity for sufficiently long periods of time (box 1, “Yes”; hourly intensity of 15-30 mm hr<sup>-1</sup>) and these events produce runoff. The increase in runoff coefficient as intensity increases for a given ASI+rainfall in Figure 5 suggests that infiltration thresholds may also be playing a role for

---

 Number: 1 Author: Anonymous Subject: Strikeout Date: 2016-07-30 12:37:06

---

 Number: 2 Author: Anonymous Subject: Replace Date: 2016-07-30 12:41:24

NO! Figure 3 in Detty & McGuire plots streamflow on the y-axis! So they do not say anything about the hillslope contribution but about the entire watershed runoff.

 Number: 3 Author: Anonymous Subject: Note Date: 2016-07-30 12:43:54

Please be more specific about what they found for what landscape position

 Number: 4 Author: Anonymous Subject: Insert Text Date: 2016-07-30 12:43:03

in their catchment

 Number: 5 Author: Anonymous Subject: Note Date: 2016-07-30 12:44:29

threshold behaviour of what (streamflow, groundwater, soil moisture)?

 Number: 6 Author: Anonymous Subject: Note Date: 2016-07-30 12:52:36

What about other studies?

 Number: 7 Author: Anonymous Subject: Note Date: 2016-07-30 12:53:23

threshold to initiate what? Streamflow, groundwater response?

 Number: 8 Author: Anonymous Subject: Note Date: 2016-07-30 12:54:32

Please be more clear in the section before what your three runoff processes are and why?

 Number: 9 Author: Anonymous Subject: Note Date: 2016-07-30 12:59:42

I think it is good to discuss your findings in the light of Fig1. But you miss out a spatial difference in runoff generation mechanisms across the catchment and treat all as one! I think this is not insightful enough! The scheme in Figure 1 should be applied to different landscape units in your catchment and could so reveal a mosaic of processes. Next step would be to discuss connectivity between these mosaic parts. That's something different!



wetter conditions (i.e. box 1 “Yes”) but that infiltrated water (the dashed link in Figure 1) also contributes through other mechanisms.

The final group of events are those that produce runoff from a wet catchment at low intensity rainfall. These follow the path box 1 “No”, box 2 “Yes” and box 3 “Yes” in Figure 1. On the upper hillslope parts of the catchment the subsurface flow capacity is sufficient that the water table does not reach the surface and water drains either during or shortly after the storm (box 6, “Yes”). Subsurface connectivity develops during the event and subsurface flow dominates. In the riparian area in the lower part of the catchment there is a substantial reduction in lateral subsurface flow capacity due to much lower slopes (and probably lower hydraulic conductivity associated with poorly structured, poorly drained soils) and this area drains very slowly; taking longer than the typical time between events in the wet season (box 7, “Yes”), resulting in saturation excess runoff from the lower catchment. Hence under wet conditions this catchment produces a mix of saturation excess and subsurface storm flow, but from geographically distinct parts of the catchment.

The above illustrates how the framework in Figure 1 can be used to understand the role of different thresholds regarding fluxes and timescales in determining runoff mechanisms. Such a framework is likely to be particularly valuable where there is a mix of runoff mechanisms operating for different events or in different parts of the catchment. Our study catchment nicely illustrates such a mixture.

## 5 Conclusion

This study has examined the role of intensity and wetness thresholds in determining runoff responses for an agricultural hillslope in the Lang Lang River catchment, Victoria, Australia. Both intensity dependent and wetness dependent thresholds were identified in the runoff response. During wet conditions, hydrological connectivity has a strong influence on water delivery to the riparian area. Saturation excess runoff from the riparian zone was also important. The results of this study demonstrated that:

- 1) Runoff generation in most events is dependent on the catchment connectivity and soil moisture conditions. When the sum of the antecedent soil water storage and event rainfall exceeded 250 mm, runoff was typically produced by a mix of saturation excess and subsurface storm flow. Under these conditions, a water table forms in the soil and a saturated area develops in the riparian zone. When the water level rises to within about 1 m of the surface at mid slope sites, rapid subsurface flow paths are activated which connected the mid slope and riparian area, contributing event flow to the hillslope flume.
- 2) When the catchment became very wet, high water levels persisted at the mid slope sites which remained hydrologically connected to the riparian area and baseflow became persistent between events.
- 3) High rainfall intensity events produced runoff even when the soil water content plus event rainfall content was below the 250 mm threshold. This could be due to either Hortonian overland flow or fast subsurface preferential flow paths being activated.

 Number: 1 Author: Anonymous Subject: Note Date: 2016-07-30 13:01:02

---

give evidence why you assume this?

 Number: 2 Author: Anonymous Subject: Note Date: 2016-07-30 13:02:05

---

I am not is sure if it is only one process over the entire event

 Number: 3 Author: Anonymous Subject: Note Date: 2016-07-30 13:03:14

---

I am not so sure: I think Fig 1 is for hte point-or plot-scale and needs an additional step (assessing connectivity) be be meaningful on the catchment scale.

 Number: 4 Author: Anonymous Subject: Note Date: 2016-07-30 14:05:26

---

General Comment:

The conclusions are drawn from one or two individual rainfall events and not logically derived or supported from the results of this study. I would encourage the authors to refine and strengthen their analysis based on more of their dataset. I think it is good to discuss the findings in the light of Fig1. but as it is originally developed for point- or plot scale assessments it misses out the spatial (and temporal) heterogeneity across a catchment. – a fundamental aspect when analyzing thresholds and connectivity.atial variability within the catchment.

 Number: 5 Author: Anonymous Subject: Note Date: 2016-07-30 13:13:23

---

Soil moisture is measured at one site in the catchment?

 Number: 6 Author: Anonymous Subject: Note Date: 2016-07-30 13:13:02

---

I think you are limited in how much you can say about connectivity

 Number: 7 Author: Anonymous Subject: Note Date: 2016-07-30 13:14:05

---

This is your assumption not clear from data

 Number: 8 Author: Anonymous Subject: Note Date: 2016-07-30 13:15:06

---

I think flow and connectivity cannot be derived form your data. You assume, that this happens.

 Number: 9 Author: Anonymous Subject: Note Date: 2016-07-30 13:16:59

---

What is the hillslope flume? It appears here for the first time do you men the streamflow flume at the catchmetrn outlet?!



We have also advanced a set of threshold conditions or questions (Figure 1) that allow a logical examination of which runoff mechanism are likely to be important in a catchment given, thresholds regarding fluxes and timescales. This framework provides a useful way of thinking through the controls on rainfall-runoff response as conditions change either between events or between different parts of the catchment. It is illustrated using the behaviour of this catchment. Our study catchment demonstrates a mix of intensity dependent and wetness dependent processes, something which has been rarely reported for humid catchments.

### Acknowledgements

The project was funded by the Australian Research Council (grant DP0987738). Saffarpour was supported by an International Postgraduate Research Scholarship (IPRS) from the Australian Government and an International Research Scholarship from the University of Melbourne (MIRS). Peter and Wilma Mackay provided access to their farm for the study. Many people helped in the field, especially Rodger Young, Lucas Dowell, Olaf Klimczak and Jacqui Lloyd. The water samples were analysed for  $^{18}\text{O}$  and  $\delta^2\text{H}$ , either by Ian Carwright's Earth Sciences laboratory, Monash University or by Russell Drysdale's isotope laboratory at the University of Melbourne. The chloride data were analysed by Mike Grace's Water Studies Laboratory, Monash University. Tony Weatherly assisted with soil interpretation at the site.

### References

- Adams, R., Arafat, Y., Eate, V., Grace, M. R., Saffarpour, S., Weatherley, A. J., and Western, A. W.: A catchment study of sources and sinks of nutrients and sediments in south-east Australia, *Journal of Hydrology*, 515, 166-179, <http://dx.doi.org/10.1016/j.jhydrol.2014.04.034>, 2014.
- Ali, G., Oswald, C. J., Spence, C., Cammeraat, E. L., McGuire, K. J., Meixner, T., and Reaney, S. M.: Towards a unified threshold based hydrological theory: necessary components and recurring challenges, *Hydrological Processes*, 27, 313-318, 2013.
- Beven, K. J., and Germann, P.: Macropores and water flow in soils, *Water Resources Research*, 18, 1311-1325, 1982.
- Bowes, M. J., Smith, J. T., and Neal, C.: The value of high-resolution nutrient monitoring: A case study of the River Frome, Dorset, UK, *Journal of Hydrology*, 378, 82-96, 2009.
- Bracken, L., and Croke, J.: The concept of hydrological connectivity and its contribution to understanding runoff-dominated geomorphic systems, *Hydrological Processes*, 21, 1749-1763, 10.1002/hyp.6313, 2007.
- Bureau of Meteorology: Australian Climate Averages – Evapotranspiration (Climatology 1961-1990): [http://reg.bom.gov.au/jsp/ncc/climate\\_averages/evapotranspiration/IDCetgrids.jsp](http://reg.bom.gov.au/jsp/ncc/climate_averages/evapotranspiration/IDCetgrids.jsp), access: 2/4/2012, 2005.

I think Fig1 is a point or plot scale

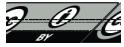

- Bureau of Meteorology: Australian Climate Averages – Rainfall (Climatology 1961–1990): [http://reg.bom.gov.au/jsp/ncc/climate\\_averages/rainfall/index.jsp](http://reg.bom.gov.au/jsp/ncc/climate_averages/rainfall/index.jsp), access: 2/4/2012, 2009.
- Buttle, J. M., Dillon, P. J., and Eerkes, G. R.: Hydrologic coupling of slopes, riparian zones and streams: an example from the Canadian Shield, *Journal of Hydrology*, 287, 161-177, doi:10.1016/j.jhydrol.2003.09.022, 2004.
- 5 Campbell Scientific: CS616 and CS625 water content reflectometers instruction manual, Campbell Scientific, Logan, UT, 2006.
- Detty, J. M., and McGuire, K. J.: Threshold changes in storm runoff generation at a till-mantled headwater catchment, *Water Resources Research*, 46, W07525, W07525, doi:10.1029/2009wr008102, 2010.
- Dunne, T., and Black, R. D.: An experimental investigation of runoff production in permeable soils, *Water Resour. Res.*, 6,  
10 478-490, 1970a.
- Dunne, T., and Black, R. D.: Partial area contributions to storm runoff in a small New England watershed, *Water Resources Research*, 6, 1296-1311, 1970b.
- Freer, J., McDonnell, J. J., Beven, K., Peters, N. E., Burns, D., Hooper, R., Aulenbach, B., and Kendall, C.: The role of bedrock topography on subsurface storm flow, *Water Resources Research*, 38, W12410, 2002.
- 15 Fujimoto, M., Ohte, N., and Tani, M.: Effects of hillslope topography on hydrological responses in a weathered granite mountain, Japan: comparison of the runoff response between the valley-head and the side slope, *Hydrological Processes*, 22, 2581-2594, 10.1002/hyp.6857, 2008.
- Grayson, R. B., Western, A. W., Chiew, F. H. S., and Blöschl, G.: Preferred states in spatial soil moisture patterns: Local and non-local controls, *Water Resources Research*, 33, 2897-2908, 1997.
- 20 Hewlett, J. D., and Hibbert, A. R.: Factors affecting the response of small watersheds to precipitation in humid areas, *Forest Hydrology*, 275–290, 1967.
- Holz, G. K.: Sources and processes of contaminant loss from an intensively grazed catchment inferred from patterns in discharge and concentration of thirteen analytes using high intensity sampling, *Journal of Hydrology*, 383, 194-208, 2010.
- Hopp, L., and McDonnell, J.: Connectivity at the hillslope scale: Identifying interactions between storm size, bedrock  
25 permeability, slope angle and soil depth, *Journal of Hydrology*, 376, 378-391, 2009.
- Horton, R.: The role of infiltration in the hydrologic cycle, *Trans. Am. Geophys. Union*, 14, 446-460, 1933.
- Houser, P., Goodrich, D., and Syed, K.: Runoff, precipitation, and soil moisture at Walnut Gulch, in: *Spatial Patterns in Catchment Hydrology: Observations and Modelling*, edited by: Grayson, R., and Blöschl, G., Cambridge University Press, Cambridge, 125-157, 2000.
- 30 Isbell, R. F.: *The Australian Soil Classification*, Australian Soil and Land Survey Handbooks, CSIRO Publishing, Collingwood, Vic., Australia, 144 pp., 2002.
- Jackson, C. R., Bitew, M., and Du, E.: When interflow also percolates: downslope travel distances and hillslope process zones, *Hydrological Processes*, 28, 3195-3200, 10.1002/hyp.10158, 2014.

No Comments.



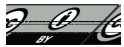

- Janzen, D., and McDonnell, J. J.: A stochastic approach to modelling and understanding hillslope runoff connectivity dynamics, *Ecological Modelling*, 298, 64-74, <http://dx.doi.org/10.1016/j.ecolmodel.2014.06.024>, 2015.
- Jencso, K. G., McGlynn, B. L., Gooseff, M. N., Wondzell, S. M., Bencala, K. E., and Marshall, L. A.: Hydrologic connectivity between landscapes and streams: Transferring reach-and plot-scale understanding to the catchment scale, *Water Resources Research*, 45, W04428, 2009.
- Kennedy, V. C., Zellweger, G. W., and Avanzino, R. J.: Variation of rain chemistry during storms at two sites in northern California, *Water Resources Research*, 15, 687-702, 1979.
- Kirchner, J. W.: Getting the right answers for the right reasons: Linking measurements, analyses, and models to advance the science of hydrology, *Water Resources Research*, 42, 2006.
- 10 Lehmann, P., Hinz, C., McGrath, G., Tromp-van Meerveld, H. J., and McDonnell, J. J.: Rainfall threshold for hillslope outflow: an emergent property of flow pathway connectivity, *Hydrology and Earth System Sciences*, 11, 1047-1063, 2007.
- McGlynn, B. L., and McDonnell, J. J.: Quantifying the relative contributions of riparian and hillslope zones to catchment runoff, *Water Resources Research*, 39, n/a-n/a, [10.1029/2003WR002091](https://doi.org/10.1029/2003WR002091), 2003.
- McGuire, K. J., and McDonnell, J. J.: Hydrological connectivity of hillslopes and streams: Characteristic time scales and  
15 nonlinearities, *Water Resources Research*, 46, W10543, 2010.
- Morton, F. I.: Operational estimates of areal evapotranspiration and their significance to the science and practice of hydrology, *Journal of Hydrology*, 66, 1-76, 1983.
- Ocampo, C. J., Sivapalan, M., and Oldham, C.: Hydrological connectivity of upland-riparian zones in agricultural catchments: Implications for runoff generation and nitrate transport, *Journal of Hydrology*, 331, 643-658,  
20 [10.1016/j.jhydrol.2006.06.010](https://doi.org/10.1016/j.jhydrol.2006.06.010), 2006.
- Oldham, C. E., Farrow, D. E., and Peiffer, S.: A generalized Damköhler number for classifying material processing in hydrological systems, *Hydrol. Earth Syst. Sci.*, 17, 1133-1148, [10.5194/hess-17-1133-2013](https://doi.org/10.5194/hess-17-1133-2013), 2013.
- Penna, D., van Meerveld, H. J. T., Gobbi, A., Borga, M., and Fontana, G. D.: The influence of soil moisture on threshold runoff generation processes in an alpine headwater catchment, *Hydrology and Earth System Sciences*, 15, 689-702, 2011.
- 25 Tetzlaff, D., Carey, S. K., Laudon, H., and McGuire, K.: Catchment processes and heterogeneity at multiple scales- benchmarking observations, conceptualization and prediction Preface, *Hydrological Processes*, 24, 2203-2208, [10.1002/hyp.7784](https://doi.org/10.1002/hyp.7784), 2010.
- Tockner, K., Pennetzdorfer, D., Reiner, N., Schiemer, F., and Ward, J. V.: Hydrological connectivity, and the exchange of organic matter and nutrients in a dynamic river-floodplain system (Danube, Austria), *Freshwater Biology*, 41, 521-535,  
30 [10.1046/j.1365-2427.1999.00399.x](https://doi.org/10.1046/j.1365-2427.1999.00399.x), 1999.
- Tromp-van Meerveld, H., Peters, N., and McDonnell, J.: Effect of bedrock permeability on subsurface stormflow and the water balance of a trenched hillslope at the Panola Mountain Research Watershed, Georgia, USA, *Hydrological Processes*, 21, 750-769, 2007.

No Comments.



- Tromp-van Meerveld, H. J., and McDonnell, J. J.: Threshold relations in subsurface stormflow: 2. The fill and spill hypothesis, *Water Resour. Res.*, 42, W02411, doi:10.1029/2004WR003800, 2006a.
- Tromp-van Meerveld, H. J., and McDonnell, J. J.: Threshold relations in subsurface stormflow: 1. A 147-storm analysis of the Panola hillslope, *Water Resources Research*, 42, W02410, 2006b.
- 5 Tromp van Meerveld, I., and McDonnell, J. J.: Comment to “Spatial correlation of soil moisture in small catchments and its relationship to dominant spatial hydrological processes, *Journal of Hydrology* 286: 113–134”, *J. Hydrol.*, 303, 307-312, 2005.
- Uchida, T., Asano, Y., Onda, Y., and Miyata, S.: Are headwaters just the sum of hillslopes?, *Hydrological Processes*, 19, 3251-3261, 2005.
- 10 Department of Economic Development, Jobs, Transport and Resources. Victorian Resources Online. West Gippsland Region. Geology of Southern Gippsland: [http://vro.dpi.vic.gov.au/dpi/vro/wgregn.nsf/pages/wg\\_lf\\_geology](http://vro.dpi.vic.gov.au/dpi/vro/wgregn.nsf/pages/wg_lf_geology), access: 3/9/2013, 2013.
- Western, A. W., Blöschl, G., and Grayson, R. B.: How well do indicator variograms capture the spatial connectivity of soil moisture?, *Hydrological Processes*, 12, 1851-1868, 1998.
- 15 Western, A. W., and Grayson, R. B.: The Tarrawarra data set: Soil moisture patterns, soil characteristics, and hydrological flux measurements, *Water Resources Research*, 34, 2765-2768, 1998.
- Western, A. W., Grayson, R. B., Blöschl, G., Willgoose, G. R., and McMahon, T. A.: Observed spatial organisation of soil moisture and its relation to terrain indices, *Water Resources Research*, 35, 797-810, 1999.
- Western, A. W., and Grayson, R. B.: Soil moisture and runoff processes at Tarrawarra, in: *Spatial patterns in catchment hydrology - Observations and modelling*, edited by: Grayson, R. B., and Blöschl, G., Cambridge University Press, 209-246, 2000.
- 20 Western, A. W., Blöschl, G., and Grayson, R. B.: Towards capturing hydrologically significant connectivity in spatial patterns, *Water Resour. Res.*, 37, 83-97, 2001.
- Western, A. W., Zhou, S.-L., Grayson, R. B., McMahon, T. A., Blöschl, G., and Wilson, D. J.: Spatial correlation of soil moisture in small catchments and its relationship to dominant spatial hydrological processes, *Journal of Hydrology*, 286, 113-134, 2004.
- 25 Western, A. W., Zhou, S.-L., Grayson, R. B., McMahon, T. A., Blöschl, G., and Wilson, D. J.: Reply to comment by Tromp van Meerveld and McDonnell on Spatial correlation of soil moisture in small catchments and its relationship to dominant spatial hydrological processes, *Journal of Hydrology*, 303, 313-315, 2005.
- 30 Withers, P. J., and Lord, E. I.: Agricultural nutrient inputs to rivers and groundwaters in the UK: policy, environmental management and research needs, *Science of The Total Environment*, 282, 9-24, 2002.

No Comments.



**Table 1. Rainfall-runoff events summary at RBF**

| Grp<br>No | Date       | Rain<br>dur'n<br>(hr) | Total<br>rainfall<br>(mm) | Peak hourly<br>rainfall<br>intensity<br>(mm/hr) | ASI<br>(mm) | ASI+<br>rainfall<br>(mm) | Runoff<br>duration<br>(hr) | Total<br>runoff<br>(mm) | Quick<br>flow<br>(mm) | RC<br>(%) | Sat'd<br>art<br>(%) |
|-----------|------------|-----------------------|---------------------------|-------------------------------------------------|-------------|--------------------------|----------------------------|-------------------------|-----------------------|-----------|---------------------|
| 2         | 25/06/2010 | 49                    | 22.4                      | 1.8                                             | 237         | 259                      | 74                         | 7.6                     | 1                     | 4         | 4.5                 |
| 2         | 13/07/2010 | 33                    | 23.8                      | 5.4                                             | 237         | 261                      | 41                         | 3.5                     | 0.54                  | 2         |                     |
| 2         | 20/07/2010 | 15                    | 9.2                       | 4.2                                             | 272         | 281                      | 32                         | 3.1                     | 0.8                   | 9         | 5.3                 |
| 2         | 1/08/2010  | 30                    | 31.4                      | 6.2                                             | 253         | 284                      | 67                         | 19.5                    | 13.7                  | 44        | 5.5                 |
| 2         | 5/08/2010  | 52                    | 23.6                      | 2                                               | 275         | 299                      | 96                         | 21.6                    | 7                     | 30        | 5.5                 |
| 2         | 12/08/2010 | 34                    | 17.2                      | 5                                               | 274         | 291                      | 94                         | 12.7                    | 4.3                   | 25        | 5.5                 |
| 2         | 16/08/2010 | 50                    | 19.2                      | 3.4                                             | 275         | 294                      | 73                         | 16.9                    | 7.7                   | 40        | 5.5                 |
| 2         | 18/08/2010 | 34                    | 14.6                      | 4                                               | 286         | 301                      | 57                         | 13.8                    | 4.6                   | 32        | 5.5                 |
| 2         | 24/08/2010 | 4                     | 9.6                       | 5.2                                             | 273         | 283                      | 24                         | 4.1                     | 1.6                   | 17        | 5.5                 |
| 2         | 25/08/2010 | 59                    | 12.6                      | 2                                               | 285         | 298                      | 73                         | 10                      | 1.4                   | 11        | 5.5                 |
| 2         | 31/08/2010 | 22                    | 12.4                      | 2                                               | 271         | 283                      | 80                         | 9.5                     | 0.8                   | 6         | 5.5                 |
| 2         | 5/09/2010  | 47                    | 25.2                      | 3.4                                             | 272         | 297                      | 74                         | 23.1                    | 13.5                  | 54        | 5.5                 |
| 2         | 9/09/2010  | 17                    | 8.0                       | 2.4                                             | 264         | 272                      | 16                         | 1.1                     | 0.2                   | 3         | 5.3                 |
| 2         | 6/10/2010  | 18                    | 15.2                      | 6.6                                             | 231         | 246                      | 3                          | 0.37                    | 0.27                  | 2         | na                  |
| 2         | 15/10/2010 | 59                    | 34.2                      | 2.8                                             | 228         | 262                      | 86                         | 11.3                    | 3.9                   | 11        | na                  |
| 2         | 23/10/2010 | 11                    | 12.8                      | 5.2                                             | 227         | 240                      | 8                          | 1                       | 0.57                  | 4         | na                  |
| 2         | 30/10/2010 | 29                    | 32.8                      | 8.8                                             | 202         | 235                      | 16                         | 1.2                     | 0.83                  | 3         | na                  |
| 3         | 27/11/2010 | 19                    | 54.4                      | 30.4                                            | 161         | 215                      | 31                         | 7.6                     | 6.5                   | 12        | na                  |
| 2         | 19/12/2010 | 49                    | 25.6                      | 3.8                                             | 191         | 217                      | 10                         | 0.83                    | 0.18                  | 1         | na                  |

## Page:19

---

 Number: 1 Author: Anonymous Subject: Note Date: 2016-07-29 18:28:12  
typo

---

 Number: 2 Author: Anonymous Subject: Note Date: 2016-07-29 18:27:42  
define in caption!

---

 Number: 3 Author: Anonymous Subject: Note Date: 2016-07-29 18:27:19  
typo!

---

 Number: 4 Author: Anonymous Subject: Note Date: 2016-07-29 18:28:53  
Group number ? define?!

---

 Number: 5 Author: Anonymous Subject: Note Date: 2016-07-29 18:28:30  
NA? define

**Table 1. cont Rainfall-runoff events summary at RBF**

| Grp No. | Date       | Rain dur'n (hr) | Total rainfall (mm) | Peak hourly rainfall intensity (mm/hr) | ASI (mm) | ASI+ rainfall (mm) | Runoff duration (hr) | Total runoff (mm) | Quick flow (mm) | RC (%) | Sat'd area (%) |
|---------|------------|-----------------|---------------------|----------------------------------------|----------|--------------------|----------------------|-------------------|-----------------|--------|----------------|
| 3       | 4/02/2011  | 33              | 71.2                | 16.4                                   | 130      | 201                | 10                   | 2.5               | 2               | 3      | na             |
| 2       | 11/05/2011 | 122             | 63.6                | 6.6                                    | 220      | 284                | 47                   | 5.6               | 2.2             | 3      | na             |
| 2       | 22/05/2011 | 50              | 21.6                | 4.4                                    | 231      | 253                | 3                    | 0.23              | 0.1             | 0.46   | na             |
| 2       | 26/05/2011 | 37              | 13.6                | 1.6                                    | 244      | 258                | 33                   | 2.66              | 1               | 7      | na             |
| 2       | 7/06/2011  | 25              | 17.6                | 2.6                                    | 254      | 272                | 43                   | 6.7               | 2.9             | 16     | Na             |
| 2       | 17/06/2011 | 31              | 15.6                | 2.2                                    | 248      | 264                | 45                   | 3.2               | 0.2             | 1      | 4.6            |
| 2       | 21/06/2011 | 61              | 38.8                | 3.6                                    | 255      | 294                | 80                   | 21.8              | 12.1            | 31     | 4.6            |
| 2       | 5/07/2011  | 10              | 9.8                 | 2.4                                    | 253      | 263                | 26                   | 2.9               | 0.8             | 8      | 4.7            |
| 2       | 6/07/2011  | 12              | 16.6                | 6.2                                    | 267      | 284                | 29                   | 8.7               | 4.8             | 29     | 4.7            |
| 2       | 10/07/2011 | 20              | 7.4                 | 2.2                                    | 262      | 269                | 27                   | 3.7               | 1.4             | 19     | 4.7            |
| 2       | 28/09/2011 | 74              | 72.0                | 8.8                                    | 204      | 276                | 96                   | 20.1              | 6.1             | 8      | 5.4            |
| 2       | 9/10/2011  | 54              | 23.2                | 2.4                                    | 232      | 255                | 5                    | 0.35              | 0.14            | 1      | na             |
| 2       | 28/10/2011 | 19              | 30.2                | 7.8                                    | 213      | 243                | 6                    | 0.92              | 0.6             | 2      | na             |
| 3       | 8/11/2011  | 12              | 35.2                | 14.8                                   | 222      | 257                | 31                   | 10                | 7.1             | 20     | 5.2            |
| 2       | 9/11/2011  | 14              | 23.8                | 6.8                                    | 239      | 263                | 44                   | 15.7              | 8.9             | 37     | 5.2            |
| 2       | 18/11/2011 | 30              | 45.5                | 10.2                                   | 219      | 265                | 82                   | 17.7              | 8.9             | 20     | 5.5            |
| 2       | 26/11/2011 | 29              | 36.8                | 8.4                                    | 216      | 253                | 85                   | 27.6              | 16.3            | 44     | 5.5            |
| 2       | 29/11/2011 | 47              | 19.4                | 4                                      | 233      | 252                | 70                   | 11.9              | 0.9             | 5      | 5.5            |
| 3       | 10/12/2011 | 16              | 52.6                | 31                                     | 192      | 245                | 32                   | 41.1              | 35.6            | 68     | 5.5            |

No Comments.



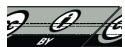**Table 2. Rainfall events summary at RBF-no flow events**

| Grp<br>No. | Date       | Rain<br>dur'n (hr) | Total<br>rainfall<br>(mm) | Peak                                       | ASI (mm) | ASI+<br>rainfall<br>(mm) | Runoff<br>duration (hr) | Total runoff<br>(mm) |
|------------|------------|--------------------|---------------------------|--------------------------------------------|----------|--------------------------|-------------------------|----------------------|
|            |            |                    |                           | hourly<br>rainfall<br>intensity<br>(mm/hr) |          |                          |                         |                      |
| 1          | 12/10/10   | 5                  | 5                         | 3                                          | 227      | 232                      | 0                       | 0                    |
| 1          | 12/10/2010 | 5                  | 5                         | 2.6                                        | 227      | 232                      | 0                       | 0                    |
| 1          | 12/11/2010 | 32                 | 28.2                      | 4.0                                        | 184      | 212                      | 0                       | 0                    |
| 1          | 25/11/2010 | 17                 | 13                        | 3.6                                        | 157      | 170                      | 0                       | 0                    |
| 1          | 2/12/2010  | 8                  | 7.2                       | 2.0                                        | 191      | 198                      | 0                       | 0                    |
| 1          | 8/12/2010  | 11                 | 19.2                      | 7.8                                        | 175      | 194                      | 0                       | 0                    |
| 1          | 9/12/2010  | 6                  | 5.2                       | 2.4                                        | 193      | 198                      | 0                       | 0                    |
| 1          | 17/12/2010 | 21                 | 15                        | 2.4                                        | 181      | 196                      | 0                       | 0                    |
| 1          | 10/01/2011 | 18                 | 10                        | 3.2                                        | 146      | 156                      | 0                       | 0                    |
| 1          | 11/01/2011 | 26                 | 10.4                      | 2.4                                        | 152      | 162                      | 0                       | 0                    |
| 1          | 13/01/2011 | 26                 | 22.2                      | 9.0                                        | 151      | 173                      | 0                       | 0                    |
| 1          | 25/01/2011 | 9                  | 5.4                       | 1.6                                        | 147      | 152                      | 0                       | 0                    |
| 1          | 5/02/2011  | 12                 | 8.6                       | 1.6                                        | 182      | 191                      | 0                       | 0                    |
| 1          | 16/02/2011 | 20                 | 14.8                      | 9.6                                        | 167      | 182                      | 0                       | 0                    |
| 1          | 26/02/2011 | 13                 | 13.4                      | 4.2                                        | 174      | 187                      | 0                       | 0                    |
| 1          | 21/04/2011 | 28                 | 8.4                       | 2.6                                        | 213      | 221                      | 0                       | 0                    |
| 1          | 1/05/2011  | 8                  | 10.8                      | 2.6                                        | 207      | 218                      | 0                       | 0                    |
| 1          | 8/05/2011  | 14                 | 7.2                       | 4.8                                        | 215      | 222                      | 0                       | 0                    |
| 1          | 5/06/2011  | 18                 | 9.4                       | 3.0                                        | 238      | 247                      | 0                       | 0                    |
| 1          | 9/09/2011  | 22                 | 12.8                      | 3.0                                        | 221      | 234                      | 0                       | 0                    |
| 1          | 19/09/2011 | 18                 | 12.2                      | 4.0                                        | 218      | 230                      | 0                       | 0                    |
| 1          | 24/10/2011 | 12                 | 15.6                      | 4.2                                        | 211      | 227                      | 0                       | 0                    |

No Comments.

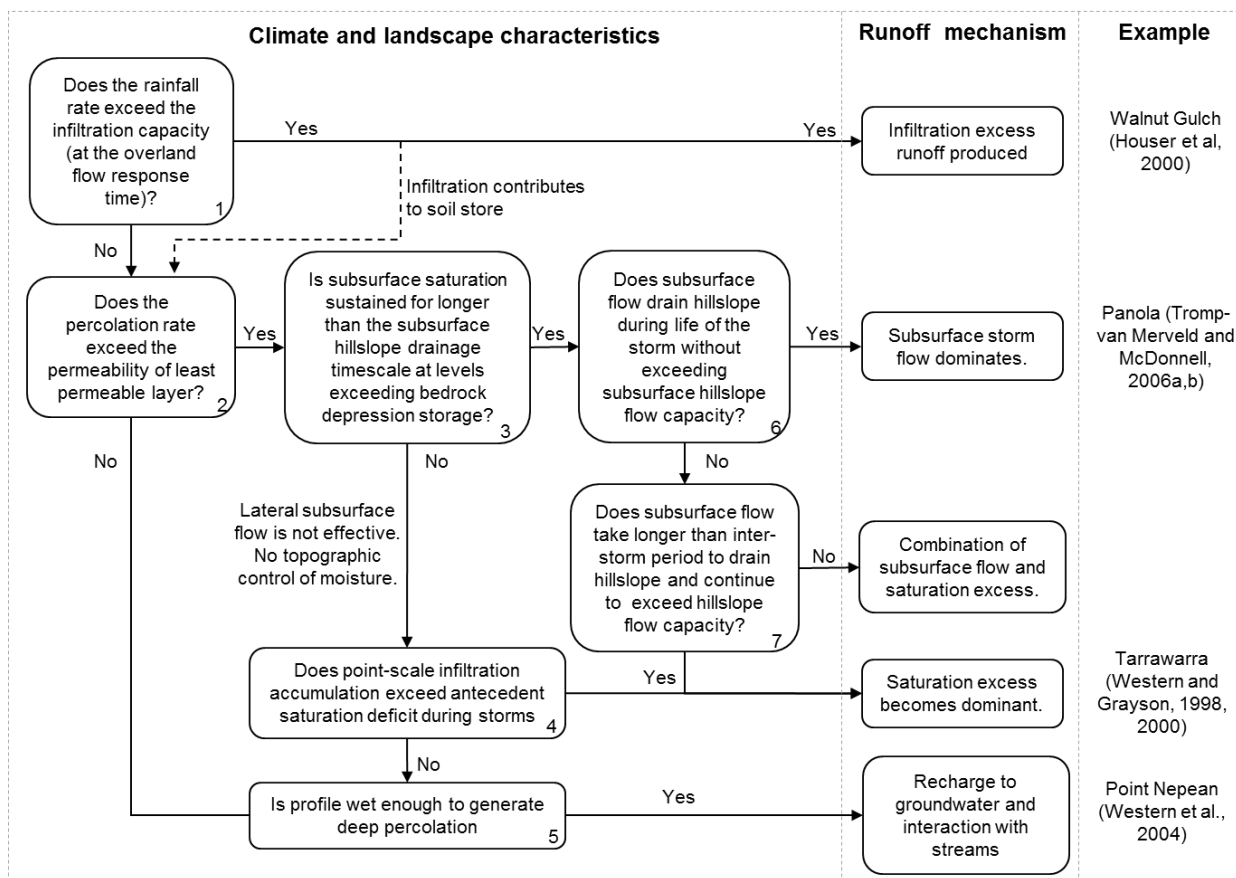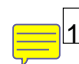

Figure 1: The role of flux and timescale thresholds in determining runoff processes.

- 1) I agree with your decision tree but in fact it results in one dominant runoff mechanisms and your paper shows that these processes co-exist in parallel in different
- 2) This view neglects the contributions form upslope or neighboring sites.
- 3) it is also not clear if you consider the hillslope-scale or the point-scale. Typically these schemes are used to characterize the point- or plot-scale.
- 4) in box #3: do you mean surface topography? Bedrock topography might be quite important (i.e. large storage to prevent still)
- 5) box #5 has no "NO" option!

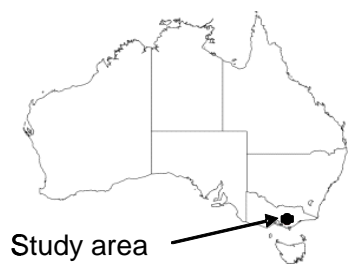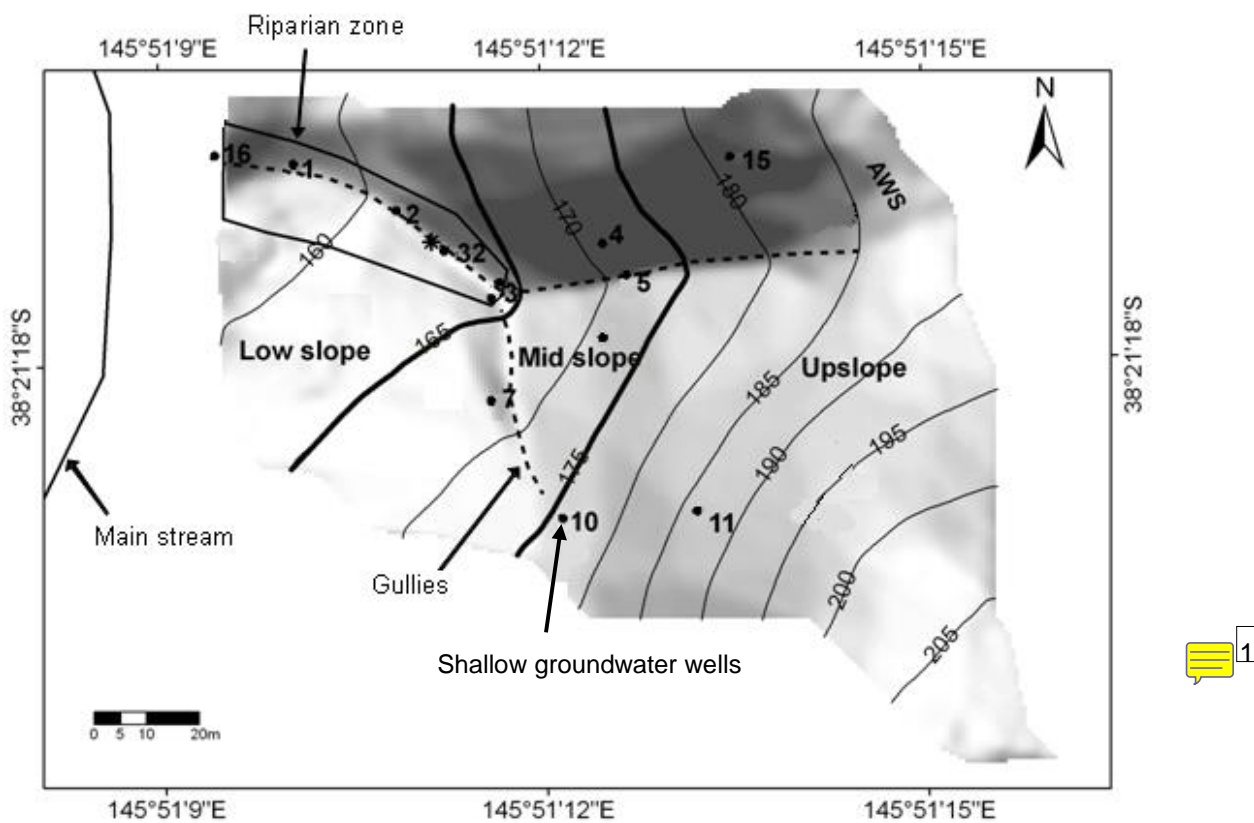

Figure 2. The study site location within Australia and a hillshaded DEM, topography and sampling site locations at RBF.

Can you distinguish the groundwater, streamflow, soil moisture, etc. sites with different symbols!

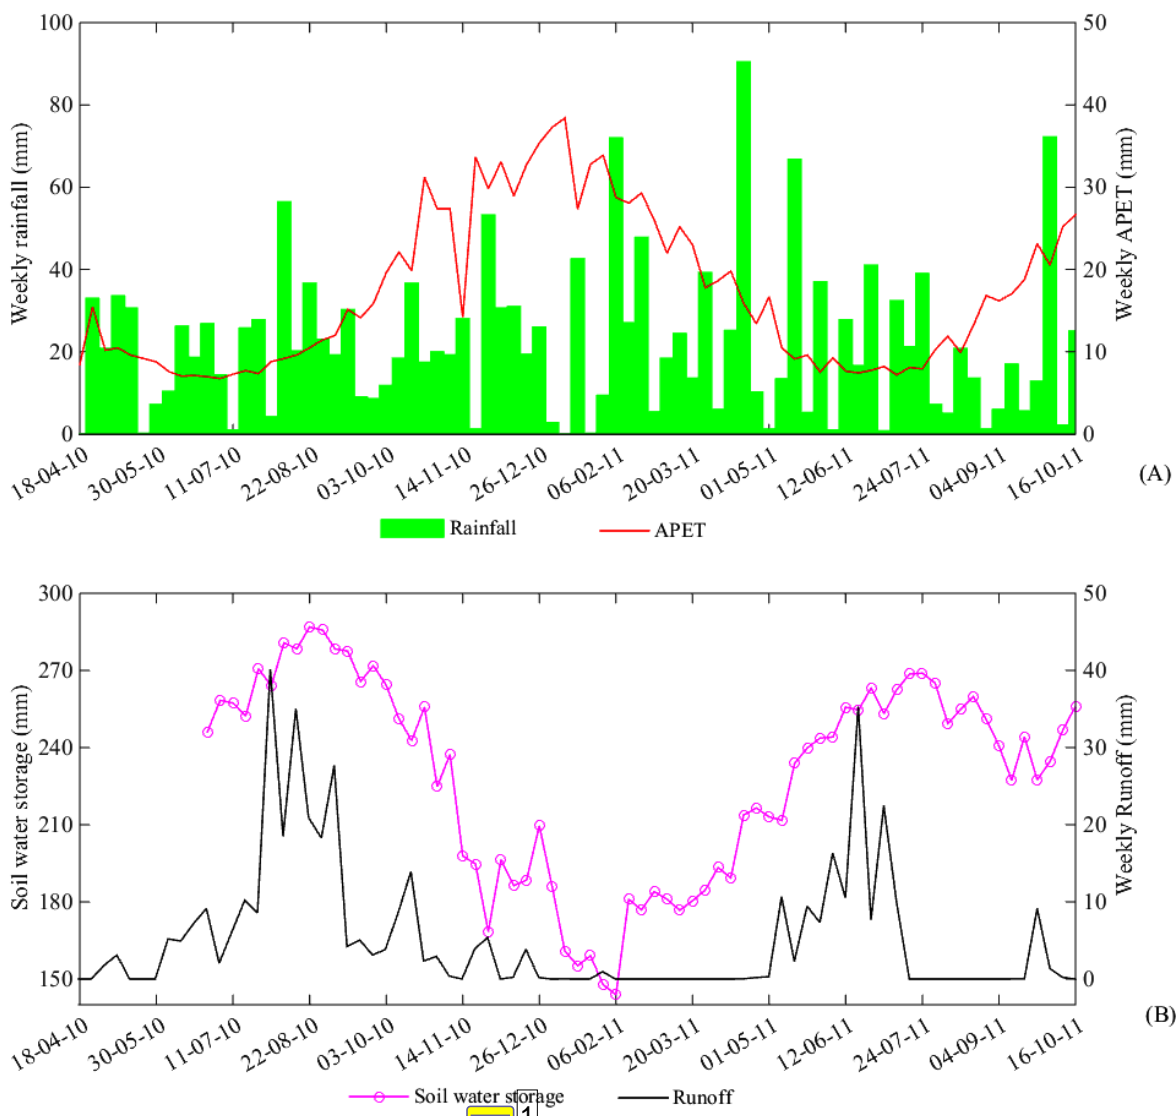

Figure 3. (A) Weekly rainfall and APET time series (data from AWS), (B) soil water storage in top 60 cm of the soil profile and weekly runoff time series at RBF.

---

 Number: 1 Author: Anonymous Subject: Note Date: 2016-07-29 18:40:42

---

important: Is this one site, n average over how many sites?

 Number: 2 Author: Anonymous Subject: Note Date: 2016-07-29 18:42:28

---

please give full names in captions so that they can stand alone. This applies to all figures and tabs!



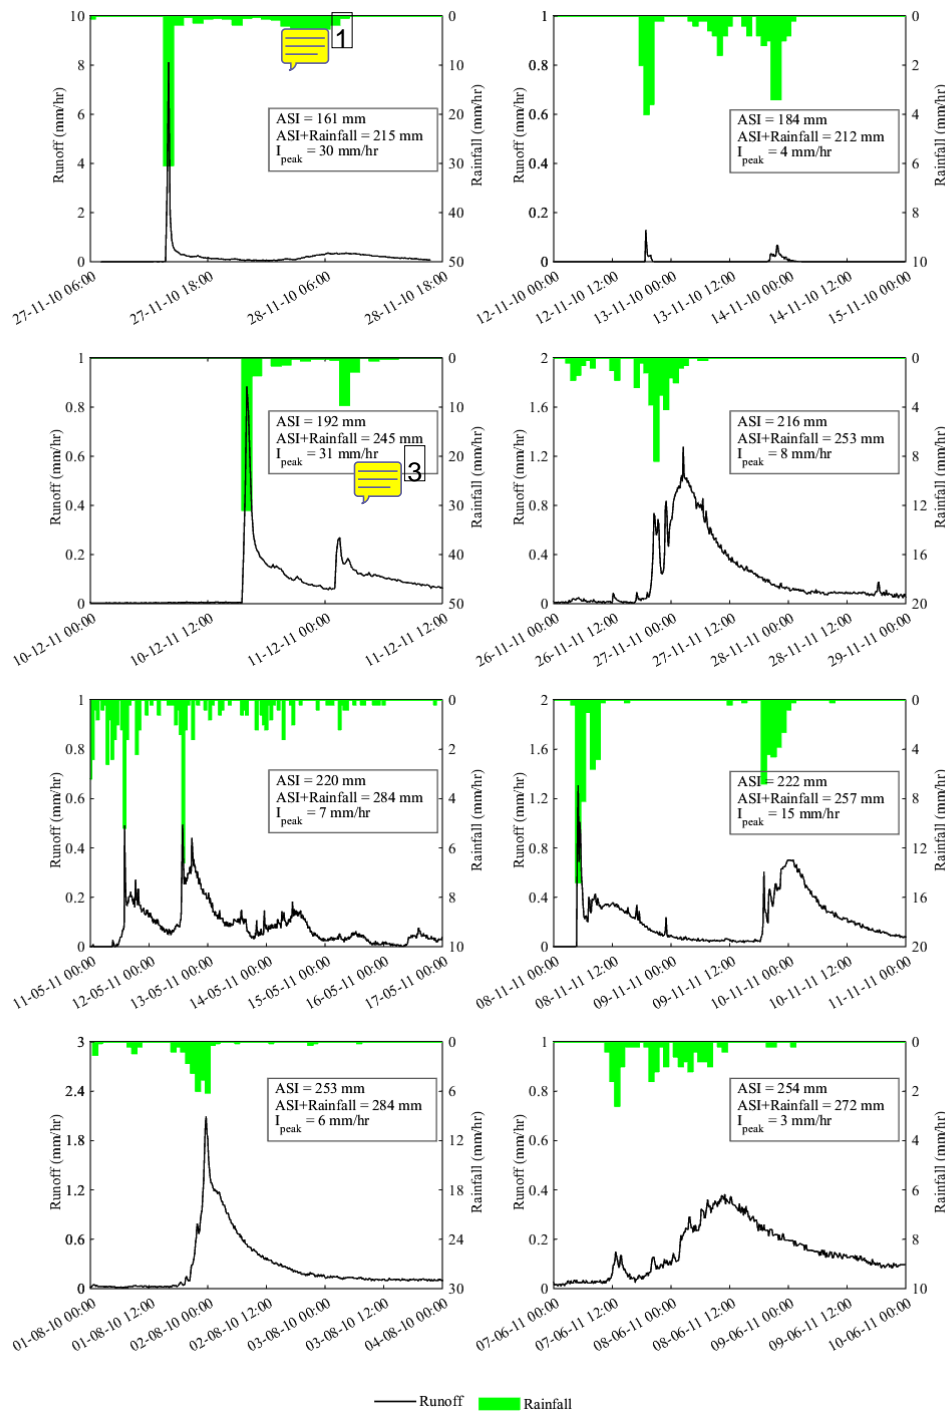

Figure 4. Overview of rainfall-runoff event characteristics and runoff behaviour at RBF

---

 Number: 1 Author: Anonymous Subject: Note Date: 2016-07-29 18:49:17  
why green?

---

 Number: 2 Author: Anonymous Subject: Note Date: 2016-07-29 18:56:10  
can you mark these events in Fig.3B!  
and  
maybe make the rows of these events bold in table 1 and 2

---

 Number: 3 Author: Anonymous Subject: Note Date: 2016-07-29 18:49:51  
include info on the streamflow as well

---

 Number: 4 Author: Anonymous Subject: Note Date: 2016-07-29 18:51:09  
8 selected rainfall events (sorted by their Antecedent Soil moisture Index (ASI), rainfall shown in blue ...

---

 Number: 5 Author: Anonymous Subject: Note Date: 2016-07-29 18:51:55  
make the reader aware, tha the y-axis scale differ between events.

---

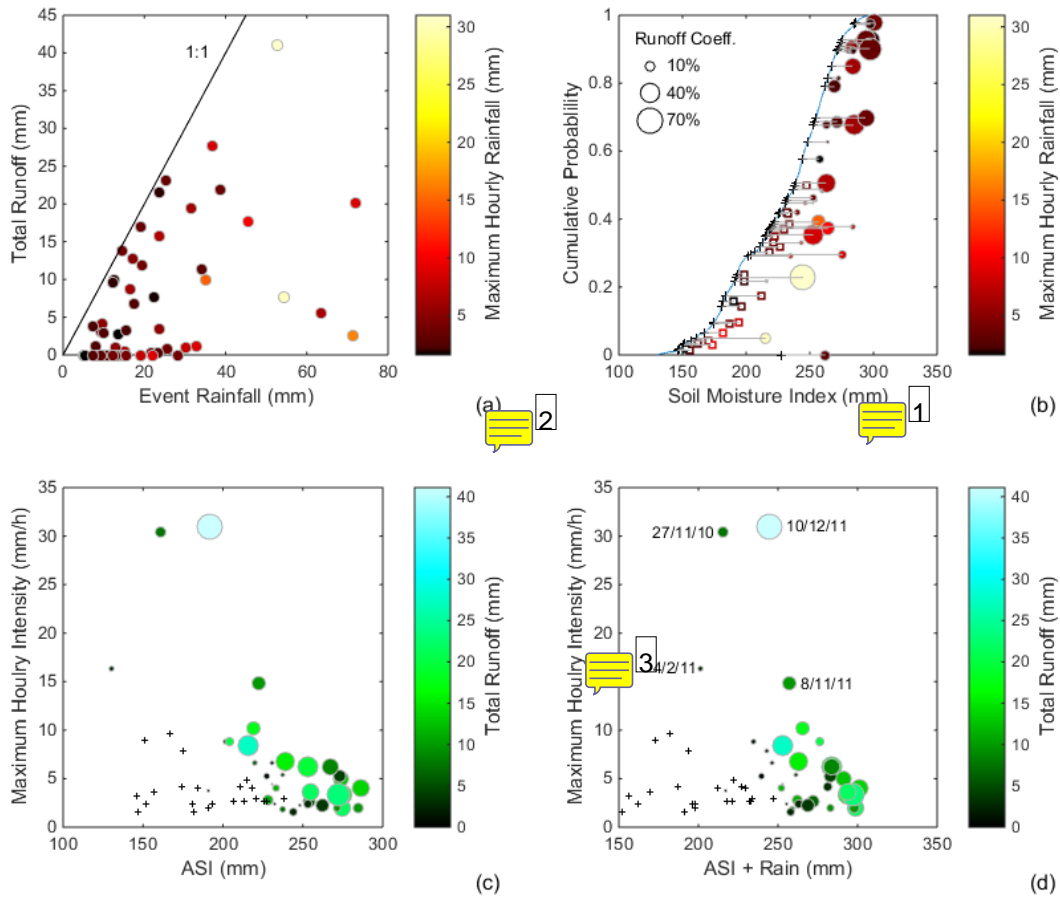

5 **Figure 5. Thresholds of runoff mechanisms at RBF, a) event rainfall versus total event runoff, colours indicate the highest hourly rainfall intensity, b) the impact of five factors together including: cumulative curve of the distribution of soil water storage as observed through the study period, ASI, ASI+rain, colour shows the peak hourly rainfall intensity ( $I_{peak}$ ) and the size of the bubbles shows the quick flow runoff coefficient, c) ASI versus the peak hourly rainfall intensity ( $I_{peak}$ ) and the size of the bubbles shows the quick flow runoff coefficient and colour shows event total runoff, and d) ASI+rain versus the peak hourly rainfall intensity ( $I_{peak}$ ) and the size of the bubbles shows the quick flow runoff coefficient and colour shows event total runoff.**

---

 Number: 1 Author: Anonymous Subject: Note Date: 2016-07-29 19:02:46

---

is this cumulative ASI? (be specific)

 Number: 2 Author: Anonymous Subject: Note Date: 2016-07-29 19:01:31

---

please put (a) in to the upper left corner

 Number: 3 Author: Anonymous Subject: Note Date: 2016-07-29 19:28:32

---

Rainfall Intensity (I guess)?

 Number: 4 Author: Anonymous Subject: Note Date: 2016-07-30 10:35:23

---

You are actually not showing thresholds in these figures

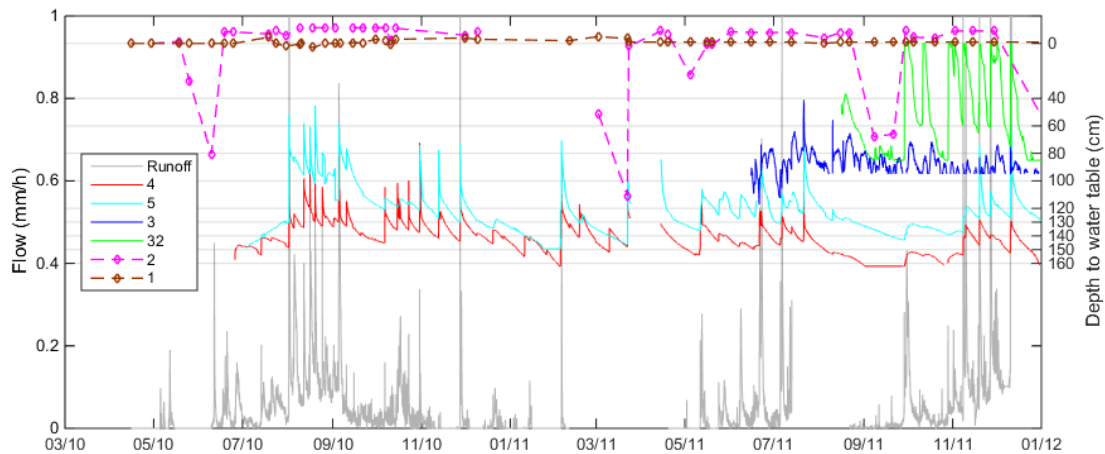

Figure 6. Time series of runoff and water levels at sites 4, 5, 3, 32, 2 and 1, manually read sites are shown with dashed lines.

---

 Number: 1 Author: Anonymous Subject: Note Date: 2016-07-30 10:39:22  
groundwater level ...

---

 Number: 2 Author: Anonymous Subject: Note Date: 2016-07-30 10:39:08  
... runoff (grey line) ...

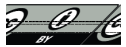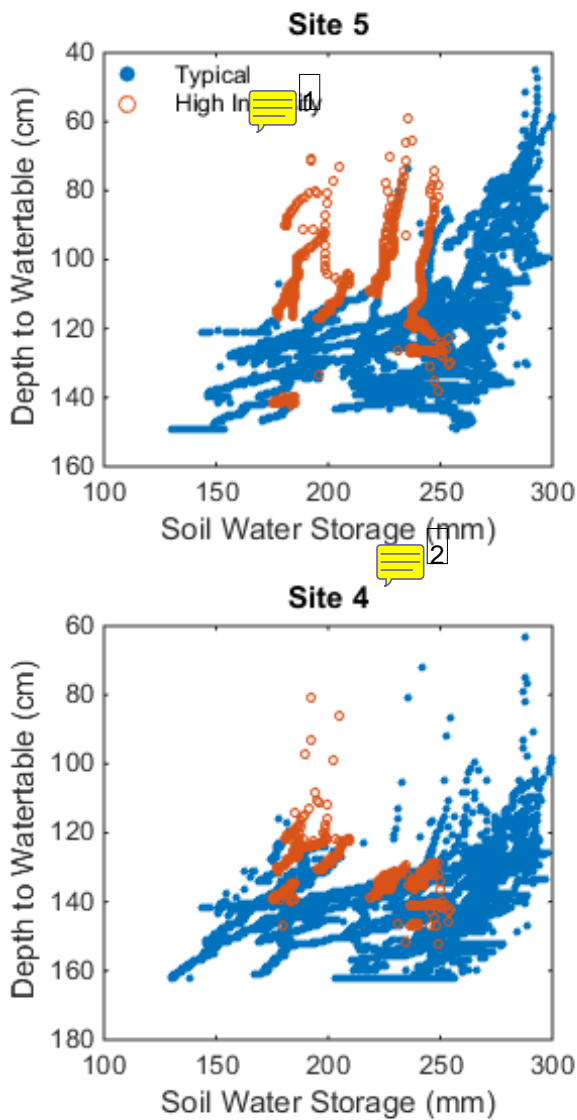

Figure 7. Soil water storage versus water table level at sites 4 and 5. Colours distinguish hourly rainfall intensity.

---

 Number: 1 Author: Anonymous Subject: Note Date: 2016-07-30 10:53:46

---

You need to define "typical" and "high intensity" in the method section and in the captions

 Number: 2 Author: Anonymous Subject: Note Date: 2016-07-30 10:54:56

---

How did you calculate soil water storage? Average across the catchment? Please state in the method section.

 Number: 3 Author: Anonymous Subject: Note Date: 2016-07-30 11:20:45

---

Please be consistent with using your terms. I guess soil water storage is volumetric water content of the upper 60 cm of the soil profile), or can you define soil water storage in the method section.



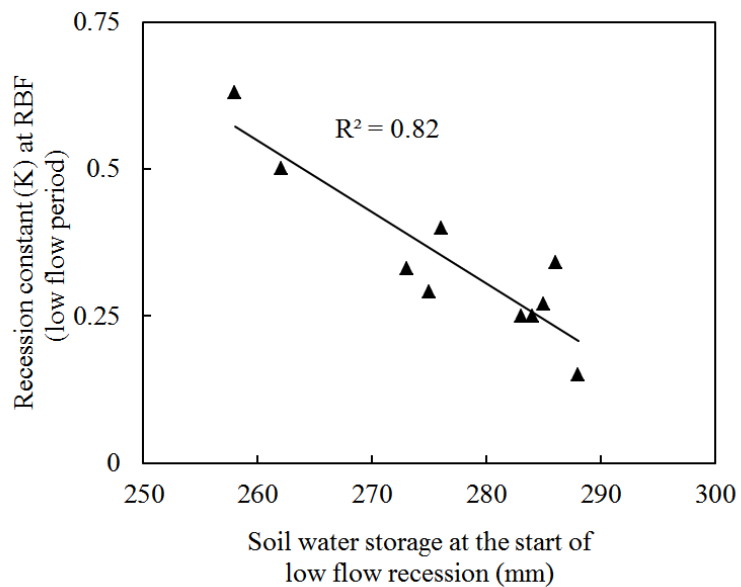

Figure 8. Recession constant ( $K$ ) and soil water storage the start of the recession for individual events  1

Important: Which events did you chose? Why not all events? Please give objective reasosn how you selected these events.

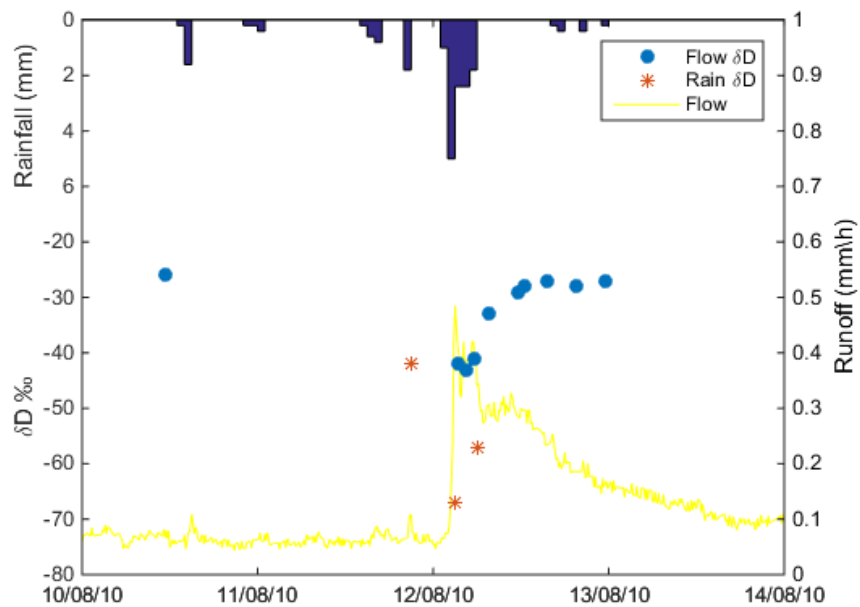

Figure 9. Time series of total rainfall and runoff,  $^2H$  of rainfall and runoff for the event on 12/8/10

No Comments.

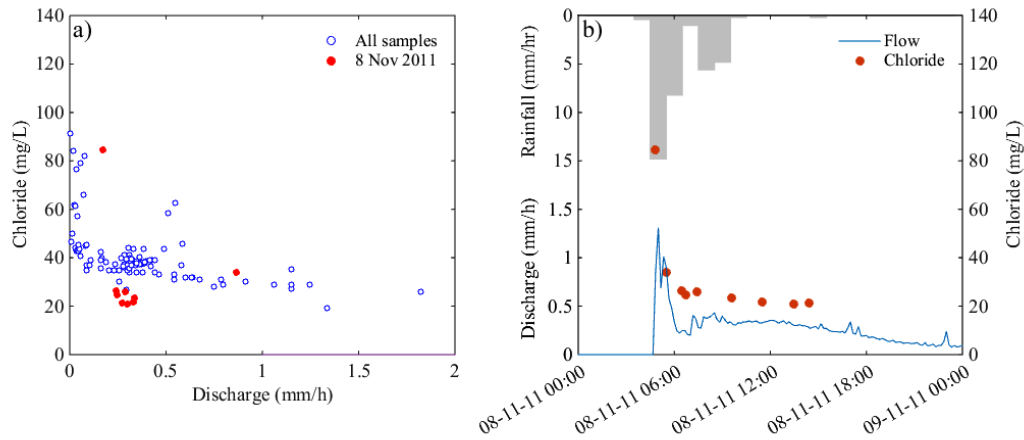

**Figure 10. a) Runoff versus  $\text{Cl}^-$  concentration for all events. The red colour identifies samples from event on 8/11/11, and b) Time series of rainfall, runoff and  $\text{Cl}^-$  concentration for the event on 8/11/11**

No Comments.
